1 **Individual heterogeneity and capture-recapture models:**

2 **what, why and how?**

3

4 Olivier Gimenez<sup>1</sup>, Emmanuelle Cam<sup>2</sup> and Jean-Michel Gaillard<sup>3</sup>

5

**Olivier Gimenez** (olivier.gimenez@cefe.cnrs.fr), CEFE UMR 5175, CNRS, Université de Montpellier, Université Paul-Valéry Montpellier, EPHE, 1919 Route de Mende, 34293 Montpellier Cedex 5, France. – **Emmanuelle Cam**, Evolution et Diversité Biologique, UMR 5174, CNRS-ENSFEA-IRD, Université Toulouse 3 Paul Sabatier – Bâtiment 4R1, 118 route de Narbonne, 31062 Toulouse Cedex 9, France. – **Jean-Michel Gaillard**, Laboratoire de Biométrie et Biologie Evolutive, UMR 5558, Université de Lyon, Université Lyon 1, 69622 Villeurbanne, France.

6

1 Variation between and within individuals in life history traits is ubiquitous in natural  
2 populations. When affecting fitness-related traits such as survival or reproduction, individual  
3 heterogeneity plays a key role in population dynamics and life history evolution. However, it  
4 is only recently that properly accounting for individual heterogeneity when studying  
5 population dynamics of free-ranging populations has been made possible through the  
6 development of appropriate statistical models. We aim here to review case studies of  
7 individual heterogeneity in the context of capture-recapture models for the estimation of  
8 population size and demographic parameters with imperfect detection. First, we define what  
9 individual heterogeneity means and clarify the terminology used in the literature. Second, we  
10 review the literature and illustrate why individual heterogeneity is used in capture-recapture  
11 studies by focusing on the detection of life-history trade-offs, including senescence. Third, we  
12 explain how to model individual heterogeneity in capture-recapture models and provide the  
13 code to fit these models ([https://github.com/oliviergimenez/indhet\\_in\\_CRmodels](https://github.com/oliviergimenez/indhet_in_CRmodels)). The  
14 distinction is made between situations in which heterogeneity is actually measured and  
15 situations in which part of the heterogeneity remains unobserved. Regarding the latter, we  
16 outline recent developments of random-effect models and finite-mixture models. Finally, we  
17 discuss several avenues for future research.

18

19 *Key words:* actuarial senescence; Arnason-Schwarz model; Cormack-Jolly-Seber model;  
20 frailty; hidden Markov models; individual covariates; life-history trade-offs; mark-recapture  
21 models; mixed models; mixture models; multievent models; multistate models; random-effect  
22 models; survival estimation.

23

1

2

### 3 **Introduction**

4           Individual variation is at the core of the evolution of traits by the means of natural  
5 selection and exists within any population of living organisms. Individual variation occurs in  
6 virtually all traits, including fitness components such as reproduction and survival (Clutton-  
7 Brock 1988, Newton 1989). However, the amount of individual variation in a given trait in a  
8 given population varies a lot both within and across species. Between-individual differences  
9 in phenotypic attributes such as age (Caughley 1966, Emlen 1970), sex (Short and Balaban  
10 1994), body mass (Sauer and Slade 1987), or personality (Dingemanse and Dochtermann  
11 2013), in genotype (Coulson et al. 2011), in habitat use or habitat selection such as home  
12 range size or quality (McLoughlin et al. 2007), or in prey selection (Estes et al. 2003) have all  
13 been reported to affect most life history traits. More recently, both current and early-life  
14 environmental conditions encountered by individuals throughout their lives have been shown  
15 to generate individual differences in life history traits (Douhard et al. 2014, Berger et al.  
16 2015).

17           The potential role of individual heterogeneity in terms of population ecology has been  
18 pointed out more than 30 years ago (Lomnicki 1978, Johnson et al. 1986) and repeatedly  
19 reported since (Bolnick et al. 2011, Kendall et al. 2011). Thanks to the increasing availability  
20 of high quality data collected during long-term individual monitoring of vertebrate  
21 populations (Clutton-Brock and Sheldon 2010), assessing the magnitude of individual  
22 heterogeneity, identifying its origin, and quantifying its consequences has become a specific  
23 objective in many population studies.

3



1 negative co-variation between survival and reproduction expected from the allocation  
2 principle (Cody 1966) to show up.

3 Owing to the multiplicity of factors that shape individual heterogeneity, it is  
4 impossible to account for the total amount of individual heterogeneity by measuring even a  
5 large set of traits.. For a given trait, we can distinguish a *measured* individual heterogeneity  
6 using for instance phenotypic attributes such as age, sex, and size from an *unmeasured*  
7 individual heterogeneity that includes all the remaining variation for given age, sex and size  
8 (Plard et al. 2015). Until recently, this *unmeasured* individual heterogeneity was most often  
9 neglected. Assessing unmeasured individual heterogeneity is especially tricky when studying  
10 survival (or mortality) because this trait simply corresponds to a state shift for a given  
11 individual. Thus, an individual dying at 5 years of age will have survived over the first five  
12 years in a row and then will have died at 5 years, leaving the standard mixed model approach  
13 generally used for assessing individual heterogeneity in most traits (van de Pol and Verhulst  
14 2006, van de Pol and Wright 2009) not directly applicable. However, CR models do provide a  
15 general and flexible framework for estimating and modeling both population size and  
16 demographic parameters (including survival, dispersal and recruitment) in the face of  
17 imperfect detection that is inherent to populations in the wild (Gimenez et al. 2008). These  
18 methods rely on the longitudinal monitoring of individuals that are marked (or identifiable)  
19 ideally at birth, and then encountered (*i.e.* recaptured or seen) on subsequent occasions. The  
20 first CR methods that dealt with individual heterogeneity were developed with the aim to get  
21 unbiased estimates of population size in presence of differential individual responses to  
22 trapping (Otis et al. 1978). The context has changed in recent years, and CR studies now often  
23 focus on the process of individual heterogeneity per se to assess the diversity of life history

1 trajectories within populations, to test for the existence of different life history tactics within  
2 populations, or to assess the differential susceptibility of individuals to environmental insults.

3 Here we aim at providing a review of individual heterogeneity in the context of CR  
4 studies. We first define *what* we mean by individual heterogeneity by examining the landmark  
5 papers on the subject and clarifying the terminology with regards to more recent uses of the  
6 concept. Then we review the literature and illustrate *why* individual heterogeneity is used in  
7 CR studies by focusing on the detection of life-history trade-offs, including senescence. In a  
8 third section, we explain *how* to model individual heterogeneity in CR models. The  
9 distinction is made between situations in which heterogeneity can be explicitly handled by  
10 using states (e.g. breeding or disease states) or individual (time-varying or not) covariates  
11 (e.g. age or phenotype) and situations in which part of the heterogeneity remains unobserved.  
12 Regarding the latter, we outline recent developments of random-effect models and finite-  
13 mixture models. Lastly, we discuss several avenues for future research.

14

## 15 **What is individual heterogeneity?**

### 16 **History and definitions**

17 In CR modeling, consideration of heterogeneity between individuals of a population in  
18 demographic parameters (e.g. survival or probability of successful reproduction) has a long  
19 history: "For predictive or modeling purposes, [...], heterogeneity can lead to seriously  
20 misleading conclusions, particularly if the product of two or more parameters is involved, and  
21 heterogeneity affects both of them" (Johnson et al. 1986). Early work emphasized the  
22 distinction between situations where members of populations differ with respect to some  
23 measurable attribute (e.g. sex, age), and situations where "heterogeneity is not clearly  
24 identified with a measurable variable" (Johnson et al. 1986). In the latter situation, developing

1 methods that account for heterogeneity between individuals to estimate demographic  
2 parameters is more difficult. Early efforts toward this end echo their contemporary studies of  
3 heterogeneity in mortality risk and of aging in human demography (Vaupel et al. 1979,  
4 Manton et al. 1981, Hougaard 1984): “Unrecognized heterogeneity can lead to biased  
5 inferences, especially in time or age effects in cohort studies” (Johnson et al. 1986). In  
6 ecology, one of the earliest studies that investigated the consequences of unmeasured (and  
7 sometimes impossible to measure) variation between individuals on survival probability  
8 concerned the estimation of nest success probability using longitudinal data from nest activity  
9 (Green 1977, Johnson 1979): a nest that becomes inactive before chicks hatched is considered  
10 “dead”. The authors of early papers on CR modeling were aware of the contribution of human  
11 demographers to the development of models taking heterogeneity between individuals into  
12 account to estimate changes in mortality risk throughout life (e.g. papers cited in Johnson et  
13 al. 1986 included e.g. Keyfitz and Littman 1979, Vaupel et al. 1979 and Manton et al. 1981).  
14 According to Johnson et al. (1986), “the impact of such heterogeneity has been recognized  
15 only occasionally in animal ecology, possibly because it is difficult to deal with, and it is  
16 often relatively unimportant in many estimation problems.”

17 Unobserved heterogeneity can be handled using models including a continuous or  
18 discrete distribution of parameter values (recapture, breeding or detection probability). Early  
19 work by human demographers has pioneered the use of continuous distributions of mortality  
20 risks (e.g. Vaupel et al. 1979). In survival models, continuous distributions for individual  
21 heterogeneity translate the idea that individuals are characterized by a unique value of  
22 ‘mortality risk’ (or its complement, survival probability). In human demography, ‘frailty’ is  
23 traditionally used in time-to-event models, where the event of interest is death (data consist in  
24 the duration of time until death occurs). Generally, data from wild animals are longitudinal

1 data (i.e. either they include information on whether individuals are alive or dead at each  
2 sampling occasion, or they include information on whether individuals are contacted alive at  
3 each sampling occasion, and sometimes on whether individuals are reported as dead). The  
4 idea that populations are composed of individuals that are more or less likely to experience an  
5 event (i.e., they differ in their probability of experiencing an event) is common to several  
6 areas of research. According to Wienke (2003), “Frailty corresponds to the notions of liability  
7 or susceptibility in different settings (Falconer, 1967). In the 1960’s and 1970’s, investigators  
8 developed parallel ideas in different areas of research and designed analytical methods to  
9 account for continuous distributions of “risks” in populations. In quantitative genetics,  
10 Falconer (1967) analyzed disease incidence data and assumed a continuous distribution of  
11 risks of developing the disease: “All the causes, both genetic and environmental, that make  
12 individuals more or less likely to develop a disease, can be combined in a single measure that  
13 is called ‘liability’. The liabilities of individuals in a population form a continuous variable”.  
14 In econometrics, investigators developed duration models for employment data including  
15 unobserved heterogeneity (Chamberlain 1979), where “The heterogeneity is in individual  
16 specific differences in separation rates” (i.e., the fraction of employed workers who lose jobs  
17 per time interval, see also Heckman and Borjas 1980). Heckman and Willis (1977) focused on  
18 beta-logistic models for binary data of female labor participation and assumed a random effect  
19 for unobserved individual heterogeneity in participation probability: “It is reasonable to  
20 suppose that many of the unobserved variables remain reasonably constant over time but vary  
21 considerably among women”. Obviously, the 1960’s and 1970’s stimulated the development  
22 of analytical approaches designed to handle situations where investigators acknowledge that  
23 they do not know all the relevant variables affecting individuals’ response, or where they  
24 cannot measure all of them.



1           Clearly, the issue raised in early CR studies is that the assumption of homogeneity of  
2           populations can lead to flawed inferences about identified parameters such as survival  
3           probability or population size (Carothers 1973). In situations where survival probability varies  
4           with age, this issue has sometimes been called a Simpson’s paradox in statistics, or an  
5           ”ecological fallacy” (Kramer 1983), and has been illustrated by Cohen (1986) as follows:  
6           “The crude death rate of population A may be less than that of country B even if every age-  
7           specific death rate of country A is greater than each corresponding one of country B”. If  
8           populations are stratified according to variables that have not been considered yet, inequality  
9           of rates can be reversed, and any demographic parameter can be involved. Papers by Green  
10          (1977), Johnson (1979), Johnson et al. (1986) and the very influential paper by Vaupel and  
11          Yashin (1985) have all used analogous examples of situations with two groups to explain the  
12          consequences of unrecognized heterogeneity on inferences about mortality in ecology and  
13          human demography, respectively.

14          In the context of closed populations (i.e. assuming a population with no immigration,  
15          no emigration, no recruitment and no mortality), data are collected several times during the  
16          period when assumptions characterizing closed populations hold. CR models are restricted to  
17          the estimation of population size and can account for individual heterogeneity in the  
18          probability of being detected (e.g. Burnham and Overton 1979, Pollock 1980, Pollock et al.  
19          1990, Link 2004, Pledger 2005, Farcomeni and Tardella 2010). In such a situation,  
20          “Individuals with high detection probabilities would tend to appear in the encountered sample  
21          in greater proportion than they occur in the population” (White and Cooch 2017). In CR  
22          models, the probability of detection can be assumed to vary between individuals in relation to,  
23          e.g. sex or age-related behavioral differences and more recently to space (Efford 2004,  
24          Borchers 2012). In some studies, populations are not assumed to be composed of clusters (e.g.  
25          sex, age-classes) with different detection probabilities, but each individual is ”assumed to

1 have its own unique capture probability which remains constant over all the sampling times”  
2 (Pollock 1980, Pollock et al. 1990). In CR studies where heterogeneity in the probability of  
3 detecting an individual cannot be identified using measured variables, investigators can  
4 assume that there is a distribution of individual detection probabilities and use models with  
5 individual random effects (White and Cooch 2017). In such situations, early approaches have  
6 used Jackknife estimators (Burnham and Overton 1979) or point estimators (Chao 1987).  
7 Mixture models have also been used more recently in such situations (e.g. Norris and Pollock  
8 1996, Pledger 2000, Morgan and Ridout 2008), where populations are assumed to be  
9 composed of several hidden groups with different detection probabilities.

10 In the context of open populations (i.e. allowing immigration and emigration and/or  
11 recruitment and mortality to occur), models are used to estimate a variety of demographic  
12 parameters (e.g. survival rates, transition probabilities between reproductive states in  
13 successive years, populations size). Early papers (Cormack 1964, Jolly 1965, Seber 1965)  
14 have assumed homogeneous populations. Stratification according to age-classes (Manly and  
15 Parr 1968, Pollock 1981) and groups (Lebreton et al. 1992) was one of the first attempts to  
16 accommodate variation between individuals in survival probability. Arnason (1972, 1973),  
17 Schwarz et al. (1993), Hestbeck et al. (1991), and Nichols et al. (1994) laid the ground for  
18 models accounting for the fact that individuals might not belong to the same cluster during  
19 their entire life (Lebreton and Pradel 2002), but might move between states (e.g. locations,  
20 breeding states) in a stochastic manner (as opposed to movement between age-classes in a  
21 deterministic manner).

22 Naturally, early papers drew the same distinction as for closed populations between  
23 situations where individuals differ with respect to some measurable attribute (e.g. sex, age)  
24 and situations where “heterogeneity is not clearly identified with a measurable variable”  
25 (Pollock 1980, Johnson et al. 1986). Because open-population models can be used to estimate

1 population size, early work also focused on the consequences of heterogeneity in detection  
2 probability on population size estimation (Carothers 1973). Just as for detection probability,  
3 two approaches have been used to account for unobserved sources of heterogeneity in  
4 survival probability in CR studies (Johnson et al. 1986): finite mixture models (Pledger et al.  
5 2003) and random effects models (Royle 2008, Gimenez and Choquet 2010). Early studies  
6 that have assumed a continuous distribution of survival probability have also highlighted the  
7 methodological difficulties encountered in the 1990's (Rexstad and Anderson 1992, Burnham  
8 and Rexstad 1993). In random effects models, individual heterogeneity refers to permanent  
9 differences between individuals in demographic parameters (e.g. Royle 2008, Gimenez and  
10 Choquet 2010). This definition matches exactly the concept of unobserved individual frailty  
11 proposed by Vaupel et al. (1979) where frailty designates the risk of a given individual (that is  
12 constant throughout its lifespan) to die at a given age relative to the average risk of all  
13 individuals in the population to die at this age. Up to now, most CR studies that have used  
14 mixture models for survival probability have also considered that individuals do not change  
15 cluster during their life (e.g. Fay et al. 2016), but CR models can now accommodate situations  
16 where they do (e.g. see Cubaynes et al. 2010 for an application to detection probability). .

17 Historically dominating views of what 'heterogeneity' means in CR modeling  
18 depended on the class of models used. For example, 'heterogeneity' models in early papers  
19 focusing on closed populations referred to models where "each animal has its own unique  
20 capture probability" (Pollock 1980). Conversely, for open population models, early work on  
21 'heterogeneity' considered any degree of stratification of populations, from discrete groups,  
22 or age-structured populations, to a distinct survival probability for each individual (Johnson et  
23 al. 1986). However, 'individual heterogeneity' has rapidly been reserved for "variation in  
24 survival probabilities among individuals after taking into account variability due to age, sex,  
25 or time" (Rexstad and Anderson 1992).

## 1 **Individual heterogeneity in contemporary CR studies**

2 Demographic parameters are the target parameters to estimate in CR models (Lebreton et al.  
3 1992, 2009). Other parameters such as detection probability are required to estimate  
4 demographic parameters from CR models; detection probability is relevant to sampling in  
5 wild populations, but is not a demographic parameter. However, the impact of individual  
6 heterogeneity on every type of parameter has consequences on demographic parameter  
7 estimation. CR models allow the estimation of all types of parameters.

8         To address individual heterogeneity in demographic parameters, the survival process  
9 (alive vs. dead), or the reproductive process (e.g. breeder vs. non-breeder or success vs.  
10 failure) is treated as a random variable. Individual heterogeneity measures differences  
11 between individuals in model parameters. Today, a broad range of approaches is used to  
12 account for individual heterogeneity in CR studies. Individual heterogeneity is understood as  
13 any source of variation between individuals in demographic parameters that cannot be  
14 accounted for by temporal or spatial heterogeneity alone, with a particular focus on the fate of  
15 individuals, their early development conditions, their ontogeny, or their past allocation to  
16 reproduction as experienced breeders. Advances in statistical methods over the past 40 years  
17 have progressively enlarged the scope of models accounting for ‘individual heterogeneity’. In  
18 CR studies, the sample scheme involves attempting to detect individuals on a discrete time  
19 basis. Contrary to continuous-time models used in human demography (Allison 1982), this  
20 specific feature must have eased the development of models in the CR arena.

21         Different levels of heterogeneity lead to different perceptions of ‘heterogeneity’, but  
22 the current view of ‘individual heterogeneity’ incorporates a large range of biologically  
23 relevant situations. At the lowest level individuals have their own unique demographic value  
24 (Marzolin et al. 2011; see Table 1), as in the frailty context (Vaupel et al. 1979), with a  
25 possible variation during life (e.g. Enki et al. 2014). At a broader level, heterogeneity can

1 correspond to differences in demographic parameters between identifiable categories of  
2 individuals (e.g. identifiable groups; Drummond et al.2011), or between hidden classes or  
3 states (Péron *et al.* 2010, Pradel 2005, Johnson et al. 2016). Once included in the study,  
4 individuals can belong to the same cluster permanently (e.g. sex, hidden class; Péron *et al.*  
5 2010) or temporarily (e.g. age, body condition, breeding state; Nichols *et al.* 1994, Pradel  
6 2009, Johnson et al. 2016). What ‘heterogeneity’ covers in CR models inherently depends on  
7 model specification. In all cases, populations are considered as being heterogeneous.

8 From a biological viewpoint, individual heterogeneity in life history traits is often  
9 considered to include two components.

10 (i) Cases in which differences between individuals are shaped early in life and are  
11 permanent during the course of the life correspond to a fixed heterogeneity. In such  
12 cases, individual heterogeneity can be accounted for by using measurable  
13 covariates a priori assumed to capture much of the individual heterogeneity (e.g.  
14 rank of offspring in birds’ clutch, Drummond et al. 2011 or body mass at the end of  
15 the maternal care period in large mammals, Hamel et al. 2009). Whether  
16 measurable individual features are translated into differences in estimates of  
17 demographic parameters, and with which method, is part of the statistical exercise.  
18 When measurable variables are missing, or insufficient to account satisfactorily for  
19 heterogeneity (Hougaard 1991), investigators can assume a discrete or continuous  
20 distribution of demographic parameters (Royle 2008, Péron et al. 2010). In  
21 agreement with the concept of frailty, investigators assume that there are  
22 differences in demographic parameters between individuals that cannot be  
23 associated with measurable covariates and use latent variables to quantify them

1 (e.g. Hougaard 1995, Yashin et al. 2008, Cam et al. 2013, Hamel et al. 2014, Cam  
2 et al. 2016).

3 (ii) However, not all individual heterogeneity is fixed. Individual differences in a given  
4 trait at a given time are subjected not only to the influence of early-life conditions,  
5 but also to current conditions both at that time and between early life and that time.  
6 As above, in some situations, observable variables are available to account for  
7 variation in individuals' demographic parameters throughout their life (e.g. age:  
8 Pollock 1981; group: Lebreton *et al.* 1992; state: Nichols *et al.* 1994). However,  
9 when such observable variables are missing or inefficient at capturing most  
10 individual heterogeneity (Hougaard 1991), unobserved, latent traits changing over  
11 life can be used. Such cases correspond to 'dynamic frailty' (Pennell and Dunson  
12 2006, Duffie et al. 2009, Chambert et al. 2013, Cam et al. 2004).

13 Irrespective of the component shaping individual heterogeneity in a given population, the  
14 total amount of individual heterogeneity in that population is not constant and varies over  
15 time. Thus, Lomnicki (1978) pointed out that asymmetric responses of individuals to  
16 increased competition that occur in presence of harsh environmental conditions (Lomnicki  
17 developed his argument in the context of density-dependence but the same pattern is expected  
18 whatever the cause of resource limitation) lead individual heterogeneity within a population to  
19 increase.

20

## 21 **Why individual heterogeneity in a CR context?**

### **Individual heterogeneity seen as a nuisance**

1           Because analyzing most CR datasets requires using models that include detection  
2 probability, the existence of individual heterogeneity in this parameter has stimulated a large  
3 number of works in the early CR literature (e.g. Otis et al. 1978). As Eberhardt (1969) pointed  
4 out, “various sets of data indicate that the equal-probability-of capture assumption is not  
5 fulfilled.” Unequal detection rates may lead to biases in abundance estimate, estimated  
6 survival probability or population growth in the context of open populations (e.g. Carothers  
7 1973, Schwarz 2001). Heterogeneity in detection probability is still receiving attention in  
8 contemporary studies (Crespin et al. 2008, Cubaynes et al. 2010, Pradel et al. 2010, Marescot  
9 et al. 2011, Oliver et al. 2011, Fletcher et al. 2012, Abadi et al. 2013, White and Cooch 2016),  
10 and new methods are being developed to address heterogeneity, such as multievent models  
11 (Pradel 2009).

12

### **Individual heterogeneity as a biological process**

13           Methodological developments of CR models have considerably increased the  
14 relevance of CR studies to address questions not only in ecology, but also in evolution. A key  
15 feature of this development is the increased ability of CR models to account for variation  
16 between individuals in demographic parameters as well as detection probability at the scale  
17 assumed to be relevant in the studied context. This scale can be the individual, rather than  
18 permanent groups (e.g. sex), or temporary aggregates of individuals (e.g. reproductive states).  
19 The development of evolutionary biology as a powerful conceptual and methodological  
20 framework for biological disciplines (e.g. Dobzhansky 1973) has brought a new perspective  
21 on individual heterogeneity. In CR studies, instead of being addressed because of potential  
22 biases in estimates of abundance, survival probability or population growth rate (e.g. Crespin  
23 et al. 2008, Cubaynes et al. 2010, Pradel et al. 2010, Oliver et al. 2011, Abadi et al. 2013),

15

1 individual heterogeneity has become the focus of studies because of its biological relevance.  
2 For evolutionary biologists, the individual level can be relevant to address natural selection if  
3 heritable variation is expressed at this level (Chambert et al. 2014). In addition, variation  
4 between individuals in demographic parameters is relevant to population ecology and  
5 dynamics, whether it concerns traits that are heritable, or not, and whether it can be accounted  
6 for using observed variables, or not (e.g. Kendall and Fox 2002). Indeed, both population  
7 extinction risk and viability depend on the degree and structure of individual heterogeneity in  
8 survival probability and reproductive parameters (Conner and White 1999, Stover et al.  
9 2012).

10 Starting from classes of models where demographic parameters varied with time (Jolly  
11 1965), groups of individuals, or age, the development of software programs to build multistate  
12 models (Arnason 1972, 1973) in the 1990's has considerably increased the attractiveness of  
13 CR models. These models indeed allow biologists to address questions about a large range of  
14 factors structuring a population, which determine individual sequences of states between  
15 which individuals move in a stochastic manner (Nichols et al. 1994, Nichols and Kendall  
16 1995). These models triggered studies of life histories using CR models (e.g. Cam et al. 1998,  
17 Hadley et al. 2007). Another class of approaches, multievent models (Pradel 2005), has also  
18 helped biologists address questions about the influence of 'state' on demographic parameters  
19 (Sanz-Aguilar et al. 2011). Indeed, one of the difficulties in CR studies is that 'state' may not  
20 be observed with certainty, or even not be observed at all (Desprez et al. 2013). Moreover, the  
21 development of user-friendly software to build models with individual covariates has also  
22 stimulated work in evolutionary ecology using CR data (e.g. Gimenez et al. 2009). The  
23 question of time-specific individual covariates with missing values is still a current issue  
24 (Bonner and Schwarz 2006). The ability of CR models to accommodate variation between  
25 individuals in demographic parameters raises the issue of methods of inference about model



1 parameters in CR studies (e.g. Pledger and Schwarz 2002, Royle 2008, Gimenez and Choquet  
2 2010). This issue is tightly linked to the level of stratification of populations, or of  
3 aggregation of observations (Cooch et al. 2002). As emphasized by Nichols (2002): “If we  
4 view an individual organism’s fate or behavior at any point in space and time as a unique  
5 event not capable of informing us about the likelihood of the event for other individuals or  
6 points in space and time, then generalization and prediction become impossible”. To allow  
7 formal statistical inferences about variation in demographic parameters and detection  
8 probability in populations, CR models rely on assumptions, notably regarding unobserved  
9 heterogeneity (e.g. a distribution of random effects; Royle 2008, or a mixture model; Péron et  
10 al. 2010, Marescot et al. 2011).

11

## 12 **Assessing senescence in the wild: an increasingly popular focus of CR studies**

13 The process of senescence, which can be interpreted in the context of the allocation principle  
14 as the trade-off opposing performance during early life and performance in late life (Baudisch  
15 and Vaupel 2012, Lemaître et al. 2015), has been the focus of a large number of empirical  
16 studies during the last decade (see Nussey et al. 2013 for a review). As imperfect detection of  
17 individuals is the rule in free-ranging populations (Gimenez et al. 2008), CR has become the  
18 gold standard to measure reliably actuarial senescence in the wild (e.g. Loison et al. 1999,  
19 Bouwhuis et al. 2012). The question of level of inference has recently emerged as a critical  
20 point in CR studies of senescence (Péron et al. 2010, Marzolin et al. 2011). Based on early  
21 work by human demographers addressing heterogeneity in mortality risk (e.g. Vaupel et al.  
22 1979, ecologists have often used the concept of frailty. However, Vaupel and Yashin (1985)  
23 considered the case of a heterogeneous population with two classes of individuals, frail and  
24 robust ones. As time passes and individuals age, there is a disjunction between the variation

1 of the mean survival probability (i.e., when pooling frail and robust individuals) with age, and  
2 the variation in survival probability with age within each group (Figures 1, 2). Ignoring  
3 heterogeneity in mortality risk may lead to flawed inferences about aging rate (Vaupel and  
4 Yashin 1985, Zens and Peart 2003), a phenomenon documented in wild animals using CR  
5 models (Nussey et al. 2008, Péron et al. 2016). This phenomenon has long been  
6 acknowledged in wildlife studies for life stages other than senescence (e.g. nest mortality;  
7 Green 1977 and Johnson et al. 1986, and Burnham and Rexstad 1993 in the context of CR  
8 studies). The consequences of ignoring individual heterogeneity in survival probability have  
9 also been investigated in CR studies using special datasets with perfect detection of  
10 individuals (e.g. Cam et al. 2002a, 2013, Wintrebert et al. 2005, Fox et al. 2006, Aubry et al.  
11 2011, Knape et al. 2011).

12       The requirement of accounting for heterogeneity in survival studies was raised by  
13 human demographers very early (which distribution to use to account for individual  
14 heterogeneity in mortality risk, Manton et al. 1986) and has become a key topic in ecology.  
15 Some demographers argued that observable criteria might not account for individual  
16 heterogeneity in a satisfactory manner, and developed mixed models or mixture models for  
17 time to event data (Kannisto 1991, Abbring and Van Den Berg 2007). The debate about the  
18 appropriate distribution to consider is also taking place in ecology (e.g. Gimenez et al. 2010,  
19 Péron et al. 2010, 2016). However, in CR studies, biologists use discrete data (e.g. mixed  
20 binomial models for survival), which may lead to fewer issues with parameter identifiability  
21 and assumptions than hazard models with frailty (Wienke 2010). Moreover, to some extent,  
22 the idea of addressing heterogeneity using a distribution of latent demographic traits is  
23 coherent with approaches to quantify variation in populations that are familiar to evolutionary  
24 biologists, namely, variances in traits in quantitative genetics (Lynch and Walsh 1998,

1 Chambert et al. 2013, 2014). Recently capture-recapture animal models (CRAM) have been  
2 developed to estimate heritability of demographic parameters (Papaix et al. 2010).

3

#### 4 **Detection of trade-offs between life history traits**

5 Trade-offs are one of the cornerstones of the theory of life histories (Roff 1992). They are  
6 based on the principle of allocation (Cody 1966) and express the idea that individuals possess  
7 a limited amount of energy and have thereby to share energy among various functions so that  
8 individuals allocating a lot of energy into current reproduction cannot allocate as much into  
9 survival or future reproduction (Roff 1992). However, empirical analyses have often failed to  
10 detect trade-offs in the wild because of individual heterogeneity in resource acquisition. van  
11 Noordwijk & de Jong (1986) indeed demonstrated that positive associations between current  
12 reproduction and future survival or reproduction occur when individual heterogeneity in  
13 resource acquisition is greater than individual heterogeneity in resource allocation. The  
14 development of multistate models has attracted evolutionary biologists to study trade-offs  
15 within the CR arena (Cam et al. 1998, Yoccoz et al. 2002). Individuals are assumed to make  
16 allocation decisions according to their own state (McNamara and Houston 1996).

17 Consequently, any unobserved feature of 'state' may explain why trade-offs are not detected.  
18 Experimental approaches may help unveil trade-offs (Reznick 1985), but may also go against  
19 heterogeneity (e.g. Festa-Bianchet et al. 1998, Yoccoz et al. 2002). At the extreme, each  
20 individual can be assumed to be in a unique 'state' that cannot be measured, and trade-offs  
21 might not be detected. Some observational CR studies have provided evidence of trade-offs  
22 after identifying traits that reliably described changes in individual state (e.g. social rank,  
23 mass, etc., Hamel et al. 2009), by taking advantage of unfavorable conditions (e.g. Descamps  
24 et al. 2009) or by distinguishing direct from indirect effects (Cubaynes et al. 2012a). The

1 development of hierarchical CR models with individual heterogeneity has allowed  
2 investigators to assume a distribution of latent life history traits in populations (Royle 2008,  
3 Gimenez and Choquet 2010). In particular, Buoro et al. (2010, 2011) have been successful at  
4 detecting trade-offs using this type of approach.

5

## 6 **How to infer individual heterogeneity in CR models**

7

8 In this section, we provide details about the CR models used in the case studies reviewed  
9 above. Specifically, we focus on multistate, random-effect and finite-mixture CR models  
10 possibly including individual covariates because these are currently the most commonly used  
11 tools to incorporate individual heterogeneity and deal with detectability less than one. We  
12 focus on survival and open populations in the following tutorial, but the methods are  
13 applicable to other CR model parameters (e.g. Matechou et al. 2016), including the detection  
14 probability, and in other contexts such as closed populations. For the sake of illustration, we  
15 simulate data in R that we analyze i) in a frequentist framework using maximum likelihood  
16 methods with program MARK (White and Burnham 1999) called from R using the package  
17 RMark (Laake 2013; alternatively, see the R package marked by Laake et al. 2013) and E-  
18 SURGE (Choquet et al. 2009) and ii) in a Bayesian framework using Markov chain Monte  
19 Carlo methods with program JAGS (Plummer 2003) called from R using the package R2Jags.  
20 Below we present results from the frequentist approach only. The code to simulate data and fit  
21 CR models is available in the Supplementary materials and from GitHub  
22 ([https://github.com/oliviergimenez/indhet\\_in\\_CRmodels](https://github.com/oliviergimenez/indhet_in_CRmodels)).

23

24 ***Measured individual heterogeneity: individual covariates and multistate CR models***

1

## 2 *Individual covariates*

3 We start with a simple example of an individual  $i$  with the encounter history  $h_i = 101$  where  
4 '1' is for detected and '0' for non-detected. Here, individual  $i$  was detected on the first  
5 sampling occasion, then missed and eventually detected again on the last sampling occasion.  
6 We consider the Cormack-Jolly-Seber model for open populations and assume that neither  
7 survival probability  $\phi$  between two sampling occasions nor detection probability  $p$  at a  
8 sampling occasion vary between individuals. Then, the contribution of individual  $i$  to the  
9 model likelihood is:

$$\Pr(h_i) = \phi(1-p)\phi p \quad (1)$$

10 Now let us assume that we are able to measure individual heterogeneity under the  
11 form of an individual covariate, say  $x_i$ , which takes a specific value for individual  $i$  (Pollock  
12 2002). We assume the covariate to characterize the individual throughout the CR study (i.e., it  
13 is not a time-varying covariate, see below). Then, individual variation in the survival  
14 probability (or the detection probability) can be partly explained by this covariate through:

$$\text{logit}(\phi_i) = \beta_0 + \beta_1 x_i \quad (2)$$

15 where  $\phi_i$  is the survival probability for individual  $i$ ,  $\text{logit}(u) = \log\left(\frac{u}{1-u}\right)$  is the logit function  
16 and is used here as a constraint to make sure that survival is estimated between 0 and 1, and  
17 the  $\beta$ 's are regression coefficients to be estimated (e.g. North & Morgan 1979). Assuming  
18 now a model with individual-specific survival, Eqn (1) becomes:

$$\Pr(h_i) = \phi_i(1-p)\phi_i p \quad (3)$$

- 1 We do not estimate survival for each individual, but instead the regression coefficients  $\beta$ 's in  
2 Eqn (2) by first using the reciprocal logit function  $\text{logit}^{-1}(v) = \frac{\exp(v)}{1 + \exp(v)} = \frac{1}{1 + \exp(-v)}$  in Eqn  
3 (2) and plugging in the result in Eqn (3):

$$\Pr(h_i) = \frac{1}{1 + \exp[-(\beta_0 + \beta_1 x_i)]} (1-p) \frac{1}{1 + \exp[-(\beta_0 + \beta_1 x_i)]}^p \quad (4)$$

- 4 The covariate  $x_i$  may be continuous such as body mass or discrete such as sex. If the covariate  
5 is discrete, it is usually referred to as a *group* in the CR literature (Lebreton et al. 1992).

6 So far, we have assumed that this covariate does not vary over time, in other words  
7 that an individual  $i$  has the same value  $x_i$  of the covariate whatever the sampling occasion (i.e.  
8 matching with the concept of frailty *sensu stricto*). When dealing with time-varying  
9 individual covariates, which matches the concept of dynamic frailty (for unobserved  
10 heterogeneity), we then need to distinguish between discrete and continuous covariates.

11

#### 12 *Discrete time-varying individual covariates and multistate CR models*

13 Discrete time-varying individual covariates are referred to as *states* in the CR literature (e.g.  
14 breeder/non-breeder or infected/non-infected), and are analyzed with so-called multistate CR  
15 models (Schwarz et al. 1993, Lebreton et al. 2009). Let us assume that we measure a time-  
16 varying individual covariate with two levels, A and B, and that individual  $i$  has now the  
17 encounter history  $h_i = A0B$  with obvious interpretation. Two things might have happened on  
18 the second sampling occasion at which the individual was not detected: either it stayed in  
19 state A or it made a transition to state B. The transition event immediately calls for the  
20 introduction of additional parameters, namely the transition probability  $\psi^{AB}$  from state A to  
21 state B and  $\psi^{BA}$  from state B to state A. The probability of staying in state A (or B) is  
22 obtained as the complementary probability  $\psi^{AA} = 1 - \psi^{AB}$  (or  $\psi^{BB} = 1 - \psi^{BA}$ ). The two events

1 'being alive in state A' and 'being alive in state B' at the second sampling occasion cannot  
2 occur together: these are mutually exclusive. As a result, the contribution of individual  $i$  to the  
3 model likelihood has two components depending on the actual underlying encounter history  
4 AAB or ABB:

$$\Pr(h_i) = \phi_A (1 - \psi^{AB}) (1 - p) \phi_A \psi^{AB} p + \phi_A \psi^{AB} (1 - p) \phi_B (1 - \psi^{BA}) p \quad (5)$$

5 Note that  $p$  does not depend on state for simplicity, but this does not need to be the case. An  
6 example of the use of multistate CR models to detect life-history trade-offs in the presence of  
7 individual heterogeneity is provided in Table 2.

8

9 [Table 2 around here]

10

11 *Continuous time-varying individual covariates*

12 Continuous time-varying individual covariates are difficult to deal with. Ideally, we have:

$$\Pr(h_i) = \phi_{i1} (1 - p) \phi_{i2} p \quad (6)$$

13 with

$$\text{logit}(\phi_{it}) = \beta_0 + \beta_1 x_{it} \quad (7)$$

14 where  $\phi_{it}$  is the survival probability for individual  $i$  between sampling occasions  $t$  and  $t + 1$   
15 and  $x_{it}$  is the value of the covariate for individual  $i$  at occasion  $t$ . However, this only  
16 corresponds to the 'ideal' situation because when an individual is not detected at a particular  
17 sampling occasion, then the value of the covariate is generally unknown, which makes it  
18 impossible to form Eqn (7). A first possibility is to omit individuals with missing values or to  
19 replace the missing values by, for example, the mean of all covariate values observed for an  
20 individual. These ad-hoc approaches result in a loss of information and bias in parameter  
21 estimates and should be avoided (Kendall et al. 2003, Lee et al. 2016). A more formal

1 approach consists in imputing missing covariate values from an underlying distribution that is  
2 used to model the change in covariate values over time, typically a first-order Markov process  
3 such as a random walk (Bonner & Schwarz 2006, Langrock & King 2013; see also  
4 Worthington, King & Buckland 2015). A second possibility involves the discretization of the  
5 covariate in two or more levels so that multistate CR models can be used (Nichols et al.  
6 1992). Lastly, inference can be based on a conditional likelihood approach using only the  
7 observed covariate values – the so-called trinomial approach (Catchpole et al. 2010). Several  
8 studies have compared the statistical performances of these methods (Bonner et al. 2010,  
9 Langrock and King 2013) and found that imputation methods were sensitive to the covariate  
10 model and that all methods were sensitive to the detection probability and the number of  
11 missing values. In practice, discretizing the continuous covariate and using multistate CR  
12 models is a pragmatic approach that can easily be implemented in existing software packages.

13

#### 14 ***Unmeasured individual heterogeneity: random-effect and finite-mixture CR models***

15

16 If for some reason, heterogeneity cannot be measured, or there is a reason to believe that  
17 individual covariates do not capture the relevant variation, it can yet be incorporated using  
18 two approaches.

19

#### 20 *Random-effect CR models*

21 The usual random-effect approach has been adapted to CR models (Coull and Agresti 1999,  
22 Royle 2008, Gimenez and Choquet 2010). We write:

$$\text{logit}(\phi_i) = \beta_0 + \varepsilon_i \quad (8)$$

23 where the  $\varepsilon_i$ 's are normally distributed with mean 0 and variance  $\sigma^2$  to be estimated, which  
24 is to be plugged in Eqn (3) using the reciprocal logit function. To fit this random-effect



1 model, one can adopt a Bayesian (Royle 2008) or a Frequentist approach (Gimenez and  
2 Choquet). More complex structures in the random effects can be considered (heritability:  
3 Papaix et al. 2010a; nested effects: Choquet et al. 2013). An example of the use of random-  
4 effect CR models to detect senescence in the presence of individual heterogeneity is provided  
5 in Figure 1.

6

7

[Figure 1 around here]

8

### 9 *Finite-mixture CR models*

10 Another avenue to handle with unobserved individual heterogeneity is to use finite-mixture  
11 models (Pledger et al. 2003, 2010, Pledger 2005, Pledger and Phillpot 2008). These models  
12 assume that individuals can be categorized into a finite number of heterogeneity classes  
13 (hidden states). More explicitly, an individual may be alive in class  $C_1$  or class  $C_2$ . Then,

$$\Pr(h_i) = \pi \phi^{C_1} (1-p) \phi^{C_1} p + (1-\pi) \phi^{C_2} (1-p) \phi^{C_2} p \quad (9)$$

14 where  $\pi$  (resp.  $1-\pi$ ) denotes the proportion of newly marked individuals in class  $C_1$  (resp.  
15  $C_2$ ). Transition between classes can be considered (Pradel 2009; see below). An example of  
16 the use of finite-mixture CR models to detect senescence in the presence of individual  
17 heterogeneity is provided in Figure 2.

18

19

[Figure 2 around here]

20

### 21 **Hidden-Markov modeling framework**

22

23 CR models can be fruitfully expressed as state-space models in which the biological process

24 (survival for example) is explicitly distinguished from the observation process (detection)

25

1 (Gimenez et al. 2007, 2012, Royle 2008, King 2012). In particular, multistate CR models  
2 incorporating uncertainty in state assignment – multievent CR models – have been formulated  
3 as hidden-Markov models (HMM; Zucchini *et al.* 2016) by Pradel (2005; review in Gimenez  
4 *et al.* 2012), a particular case of state-space models in which the states are Markovian (i.e. the  
5 next state depends only on the current state and not on the sequence of states that occurred  
6 before). An advantage of the HMM formulation of CR models is that it provides high  
7 flexibility in the way individual heterogeneity is modeled. For example, the HMM  
8 formulation of finite-mixture CR models can easily be extended to consider transitions  
9 between classes of heterogeneity (Pradel 2009, Cubaynes et al. 2010). Let us define the states  
10 alive in class 1 ('C<sub>1</sub>'), alive in class 2 ('C<sub>2</sub>') and dead ('D'). The individuals can go  
11 undetected ('0') or detected ('1'). Initially, the state of an individual is driven by the vector of  
12 initial state probabilities:

$$13 \quad \Pi = \begin{bmatrix} \pi & 1-\pi & 0 \end{bmatrix}$$

14 where the states C<sub>1</sub>, C<sub>2</sub> and D are in columns in that order. Then the observation process at  
15 first capture applies through:

$$16 \quad B_1 = \begin{bmatrix} 0 & 1 \\ 0 & 1 \\ 1 & 0 \end{bmatrix}$$

17 where the states are in rows and the observations (or events) are in columns (0 and 1 in that  
18 order). Now that the fate of individuals at first capture occasions is modeled, the survival and  
19 observation processes occur successively at the subsequent occasions. The survival process is  
20 governed by:

$$21 \quad \Phi = \begin{bmatrix} \phi^{C_1} & 0 & 1-\phi^{C_1} \\ 0 & \phi^{C_2} & 1-\phi^{C_2} \\ 0 & 0 & 1 \end{bmatrix}$$

- 1 where the states at  $t$  are in rows and the states in  $t + 1$  are in columns. Individuals can be  
2 allowed to move from one heterogeneity class to the other through transition probabilities  $\psi$   
3 by multiplying the survival matrix by a transition matrix:

$$4 \quad \Phi = \begin{bmatrix} \phi^{C_1} & 0 & 1 - \phi^{C_1} & 1 - \psi^{C_1 \rightarrow C_2} & \psi^{C_1 \rightarrow C_2} & 0 \\ 0 & \phi^{C_2} & 1 - \phi^{C_2} & \psi^{C_2 \rightarrow C_1} & 1 - \psi^{C_2 \rightarrow C_1} & 0 \\ 0 & 0 & 1 & 0 & 0 & 1 \end{bmatrix}.$$

- 5 The observation process at occasion  $t$  is modeled using:

$$6 \quad B_2 = \begin{bmatrix} 1 - p & p \\ 1 - p & p \\ 1 & 0 \end{bmatrix}$$

- 7 where states are in rows and observations in columns. The probability in Eqn (9) can be  
8 written as the product of the matrices above (Pradel 2005).

9

## 10 **Is individual heterogeneity statistically relevant?**

11

- 12 Testing the statistical relevance of individual heterogeneity can be done in two ways. First,  
13 the quality of fit of models with heterogeneity to CR data can be assessed using goodness-of-  
14 fit tests. An ad-hoc procedure was proposed in the context of finite-mixture models by  
15 considering specific combinations of components of the goodness-of-fit test for homogeneous  
16 models (Péron et al. 2010). A more formal approach is being developed (Jeyam, McCrea,  
17 Pradel, unpublished results) based on methods used in behavioral sciences. Second, models  
18 with and without heterogeneity can be compared using hypothesis testing or model selection.  
19 For multistate models, model selection using the Akaike Information Criterion (AIC;

1 Burnham & Anderson 2002) is usually favored as illustrated in Table 2. In the Bayesian  
2 context, several methods have been used and we refer to review papers for guidelines (O’Hara  
3 and Sillanpää 2009, Tenan et al. 2014, Hooten et al. 2015). In random-effect models, the  
4 question boils down to testing whether the variance of the random effect is zero, which can be  
5 addressed using likelihood ratio tests (Gimenez and Choquet 2010) but may be difficult to do  
6 in a model selection framework (Bolker et al. 2009). We refer to O’Hara & Sillanpää (2009)  
7 for Bayesian methods (see also Royle 2008, Chambert et al. 2014). In finite-mixture models,  
8 standard tools from the model selection framework, namely the AIC, can be used (Cubaynes  
9 et al. 2012b), although it may fail in the context of detecting senescence (Supplementary  
10 Material A in Péron et al. 2016). In a Bayesian context, the Deviance Information Criterion  
11 (DIC; Spiegelhalter et al. 2014) is known to perform poorly on mixture models, and the  
12 Watanabe-Akaike information criteria (wAIC; Gelman et al. 2014) holds promise in this  
13 context, although it is yet to be used with CR models.

14

## 15 **Discussion and research perspectives**

16

17 **Random effects vs. mixture?** In studies based on CR models built in the context of closed or  
18 open population CR models, as well as in human demography, there is currently a debate  
19 about the distribution to consider to account for individual heterogeneity in demographic  
20 parameters (Yashin et al. 2001, Péron et al. 2010). This debate sometimes focuses on the  
21 biological justification of continuous distributions vs. mixture models (e.g. Péron et al. 2010).  
22 The debate also focuses on alternatives to distributions that might be unrealistic or inadequate  
23 (Péron et al. 2010). This question is not specific to CR modeling (Hamel et al. 2016). Clusters  
24 of individuals sharing values of latent traits can be identified using mixture models. Recently,

1 Hamel et al. (2016) addressed the question of the identification of reproductive and growth  
2 tactics in long-lived mammals using mixture models. They also used simulations and showed  
3 that in many cases the number of clusters can be chosen using an information theoretic or a  
4 bootstrap approach. Alternatively, infinite mixture models could be developed for CR data  
5 (Rasmussen 2000, Ohlssen et al. 2007, Raman et al. 2010), where the number of clusters is *a*  
6 *priori* very large, but the number of clusters including at least one individual is estimated and  
7 can range from 1 to a large number; the latter situation leads to a distribution of demographic  
8 parameters that approaches a continuous one (Ohlssen et al. 2007). Rather than comparing  
9 models that vary in complexity using for instance an information criterion, Bayesian  
10 nonparametric approaches fit a single model that can adapt its complexity to the data  
11 (Gershman & Blei 2012; see Ford, Patterson & Bravington 2015 and Manrique-Vallier 2016  
12 for applications to CR models). Moreover, the question of how to account for heterogeneous  
13 detection probability in CR models designed to estimate population size has a very long  
14 history (e.g. Carothers 1973, Link 2003, Ghosh and Norris 2005). Carothers (1973)  
15 investigated the consequences of violations of the assumption of equal detection probability  
16 on estimates from the Jolly-Seber model. He concluded that “any distribution is, from the  
17 point of view of investigating bias, as good as any other with the same [mean detection  
18 probability] and [coefficient of variation], and it is therefore justifiable to select a distribution  
19 on the grounds of computational convenience alone”. The number of classes might be itself of  
20 interest, but in the framework of closed populations, there is no straightforward means of  
21 determining the number of components of a mixture model for detection probability (Link  
22 2003), and it is strongly advised against trying to interpret the mixture parameters (Shirley  
23 Pledger, pers. comm.).

24

1 **Change in latent values of demographic parameters over lifetime.** In standard models for  
2 longitudinal data with individual heterogeneity, an independent subject-specific random effect  
3 is assumed to be constant over time for each subject (Vaupel & Missov 2014), which matches  
4 early versions of the concept of frailty (Vaupel et al. 1979). Generally, in CR studies using  
5 mixture models, each individual is also assumed to be a member of a latent class when it  
6 enters the study, and it does not change class. Mortality risk or breeding success at time 0  
7 (when the individual enters the study) is assumed to be perfectly correlated with the risk later  
8 in life (Wienke 2010). However, this assumption does not necessarily hold, and models  
9 accommodating changes in individual latent vital rates may offer an interesting basis to test  
10 biological hypotheses. An alternative approach allowing individuals to experience (reversible)  
11 changes in latent vital rates could be based on the ontogenetic view of individual differences  
12 (Senner et al. 2015). This can be achieved with ‘dynamic frailty’ models (Manda and Meyer  
13 2005, Putter and Van Houwelingen 2014), hidden Markov models (Johnson et al. 2016),  
14 Latent Class transition models or mixture models, in which individuals can change latent class  
15 over time (e.g. Kaplan 2008). Hidden Markov models are now commonly used in CR studies,  
16 but specific applications to change in latent demographic parameters are still rare (Pradel  
17 2005, Cubaynes *et al.* 2010).

18

19 **Initial conditions.** An overlooked issue in CR studies using multistate models is the issue of  
20 ‘initial conditions’. Before estimating the parameters of a model accounting for a stochastic  
21 process with dependence between consecutive states (e.g. breeding states), one has to think  
22 about how the process was “initialized”. Studies of reproduction necessarily start recording  
23 breeding outcomes at the first breeding event (recruitment, or first observed breeding  
24 attempt). More generally, studies modeling reproductive outcomes from recruitment onwards  
25 (e.g. Cam et al. 1998, Yoccoz et al. 2002) assume that the start of the process generating the

1 observed reproductive states coincides with the start of reproductive life for each individual  
2 (Wooldridge 2005). Nevertheless, the process governing the first breeding outcome can be the  
3 same as the process generating the subsequent observations in the individual lifetime  
4 trajectory (Skrondal and Rabe-hesketh 2014). Such a process can include unobserved  
5 determinants of breeding outcome. In dynamic models of reproduction incorporating the  
6 effect of past breeding outcome at time  $t$  on the probability of breeding successfully at time  
7  $t+1$  (e.g. multistate CR models), the outcome of the first reproductive attempt (at time  $t$ ) is not  
8 considered as the realization of a random process, because there is no reproduction at time  $t-1$ .  
9 Nevertheless, failure to incorporate unobserved factors governing breeding success  
10 probability at recruitment can translate into overestimation of transition probabilities between  
11 subsequent reproductive states (Heckman 1981, Prowse 2012). This is particularly  
12 problematic in studies of changes in reproductive costs throughout the lifetime (e.g. Sanz-  
13 Aguilar et al. 2008), or of experience-specific variation in breeding outcome (e.g. Nevoux et  
14 al. 2007). Interestingly, Sanz-Aguilar et al. (2008) have interpreted evidence of higher  
15 reproductive costs of reproduction at recruitment as a consequence of within-cohort mortality  
16 selection, with frailer individuals incurring higher reproductive costs than robust ones. The  
17 initial conditions problem can be overcome using a joint modeling approach of the processes  
18 governing reproductive success at recruitment and subsequent breeding occasions (Skrondal  
19 and Rabe-hesketh 2014). If CR data are available from the pre-breeding period, then  
20 unobserved and observed determinants of breeding state can be considered simultaneously  
21 (e.g. Fay et al. 2016b).

22

23 **Inference about individual heterogeneity.** Two papers have revived interest in unobserved  
24 heterogeneity in demographic parameters in CR studies (Steiner et al. 2010, Orzack et al.

1 2011). More specifically, these papers have drawn attention to the approaches used to  
2 discriminate between hypotheses about sources of variation in CR histories. In CR studies, an  
3 influential book by Burnham and Anderson (2002) has promoted the use of multimodel  
4 inference such as information criteria to address non-mutually exclusive biological  
5 hypotheses about the processes governing mortality, or the arrangement of reproductive states  
6 over lifetime trajectories of animals. For example, models accounting for state-dependence in  
7 survival or reproduction can be considered (multistate or multievent models; e.g. Sanz-  
8 Aguilar et al. 2008), models accounting for unobserved heterogeneity in these demographic  
9 parameters too (e.g. Royle 2008, Marzolin et al. 2011), as well as models accounting for both  
10 sources of variation in survival and reproduction (e.g. Fay et al. 2016a). This contrasts with  
11 approaches based on a single model (namely, state-dependence) and evaluation of the degree  
12 of consistency of observed individual CR histories with metrics summarizing key features of  
13 histories simulated using parameters estimated with the model in question (Steiner et al. 2010,  
14 Orzack et al. 2011).

15 By definition, variation in individual trajectories simulated using parameters estimated  
16 with multistate CR models is not caused by fixed, unobserved heterogeneity between  
17 individuals in their demographic parameters (Tuljapurkar et al. 2009, Steiner and Tuljapurkar  
18 2012). The variation in arrangements of states in simulated data stems from the realization of  
19 random variables governed by probabilities; the resulting pattern is called ‘dynamic  
20 heterogeneity’ (Tuljapurkar et al. 2009), or ‘individual stochasticity’ (Caswell 2009). Several  
21 papers have provided evidence that there is a good match between observed and simulated  
22 features of individual histories (Steiner et al. 2010, Orzack et al. 2011, Steiner and  
23 Tuljapurkar 2012). These studies suggest that stochastic demographic processes have been  
24 overlooked in life history studies, and that latent, unobserved heterogeneity in demographic  
25 parameters might have been overstated in studies of longitudinal data from animals, whether



1 detection probability is lower than one or not (Cam et al. 2002a, 2013, Steiner et al. 2010,  
2 Orzack et al. 2011). From a conceptual viewpoint, these studies attempt to caution biologists  
3 against over-interpreting amounts of unobserved individual heterogeneity in demographic  
4 parameters (“biologists commonly argue that large differences in fitness components are  
5 likely adaptive, resulting from and driving evolution by natural selection” Steiner &  
6 Tuljapurkar 2012, Cam et al. 2016). However, they have moved away from one of the  
7 dominating statistical inference approaches in the CR area, namely multimodel inference and  
8 information criteria (Burnham and Anderson 2002). Current research is addressing the  
9 question of whether simulations based on multistate CR models or simply models with state-  
10 dependence used for longitudinal data analysis allow discriminating between alternative  
11 hypotheses about the processes generating variability in individual histories (Plard et al. 2012,  
12 Bonnet and Postma 2016, Cam et al. 2016).

13       Importantly, proponents of dynamic heterogeneity have overlooked notes of caution  
14 from other areas of research also using multistate models for inferences about longitudinal  
15 data concerning possible biases in estimates of ‘state-dependence’ (e.g. Heckman 1981,  
16 Ahmad 2014). A key issue in discriminating between processes generating variation in  
17 individual histories is that a Markov process (i.e. the basis of multistate models) and  
18 unobserved individual heterogeneity (for instance a random effect model, Royle 2008) can  
19 create similar patterns in arrangements of states along individual trajectories (Ahmad 2014,  
20 Authier et al. 2017). This issue has stimulated a large body of work in econometrics  
21 (Heckman 1981, Ahmad 2014, Skrondal and Rabe-hesketh 2014, Andriopoulou and  
22 Tsakloglou 2015). The hypothesis of a ‘communicating vessels’ phenomenon between  
23 sources of variation in CR histories should be considered in wild animal populations, as in  
24 econometrics studies (Ahmad 2014, Plum and Ayllón 2015, Cam et al. 2016). Interestingly,

1 several CR studies have hypothesized that their results obtained using multistate models  
2 partly reflect heterogeneity between individuals in baseline breeding and survival probability  
3 (Cam et al. 1998), or phenotypic within-cohort mortality selection (i.e., the change in the  
4 composition of a heterogeneous cohort including individuals with different baseline survival  
5 probabilities; Cam et al. 2002a, Barbraud and Weimerskirch 2004, Nevoux et al. 2007, Sanz-  
6 Aguilar et al. 2008). That is, they have hypothesized that their result may be caused by  
7 unobserved individual heterogeneity, a question now being addressed in studies of senescence  
8 (Péron et al. 2010, 2016). This suggests that CR models with both a Markovian structure (for  
9 observable, partially observable, or unobservable states) and unobserved individual  
10 heterogeneity might perform well with some datasets from wild animal populations (Fay et al.  
11 2016a, b).

12

## 13 **Conclusion**

14 Our review, although not exhaustive, demonstrates that the tremendous advances in CR  
15 modeling accomplished over the past 40 years provide investigators with a reliable way to  
16 address multiple facets of the process of individual heterogeneity in demographic parameters.  
17 Pioneer works by quantitative wildlife biologists focused on individual heterogeneity in  
18 recapture or survival probability to avoid biased estimates of population size. The emergence  
19 of more general questions such as cause-specific sources of mortality in game- and non-game  
20 species (Johnson et al 1986, Koons et al. 2014) and the need for accurate assessment of the  
21 impact of global change on the demography of structured populations (Gullett et al. 2014)  
22 have triggered collaborations between biologists and statisticians to make efficient use of  
23 data, robust inferences about demographic parameters, and achieve an increasing degree of  
24 realism in both the sampling and ecological processes handled by CR models. As emphasized

1 by Conroy (2009), the nature of questions that can be addressed nowadays has been greatly  
2 expanded to include evolutionary ecology, whose cornerstone is variation in demographic  
3 parameters between individuals both within and between populations. The relevance of  
4 dealing with individual heterogeneity to study eco-evolutionary processes has placed the topic  
5 of individual heterogeneity at the core of many empirical investigations using CR data (Table  
6 1). Provided appropriate sampling design and sufficient data are available, the flexibility of  
7 modern CR models now allows assessing reliably the role of individual heterogeneity in  
8 ecology and evolutionary processes in the wild.

9

10 *Acknowledgements* –EC was supported by the Laboratoire d'Excellence LabEx TULIP  
11 (ANR-10-LABX-41). OG was supported by ANR-16-CE02-0007. We are grateful to Jim  
12 Nichols, Doug Johnson, and Ken Burnham for sharing ideas and material on their early work  
13 focusing on the consequences of individual heterogeneity in survival on population dynamics,  
14 and the development of CR models accounting for heterogeneity in survival and recapture  
15 probability. Evan Cooch provided material on ongoing analyses completing this early work  
16 with alternative methods, and Jim Nichols provided helpful comments on an earlier version of  
17 this paper. We also thank the three referees for insightful suggestions that improved the paper.

18

## 19 **References**

20 Abadi, F. et al. 2013. Revisiting the Effect of Capture Heterogeneity on Survival Estimates in  
21 Capture-Mark-Recapture Studies: Does It Matter? - PLoS One 8: e62636.  
22 Abbring, J. H. and Van Den Berg, G. J. 2007. The unobserved heterogeneity distribution in

- 1 duration analysis. - *Biometrika* 94: 87–99.
- 2 Ahmad, N. 2014. State dependence in unemployment. - *Int. J. Econ. Financ. Issues* 4: 93.
- 3 Allison, P. D. 1982. Discrete-time methods for the analysis of event histories. - *Sociol.*  
4 *Methodol.* 13: 61–98.
- 5 Andriopoulou, E. and Tsakloglou, P. 2015. Once poor, always poor? Do initial conditions  
6 matter? Evidence from the ECHP. - In: *Measurement of Poverty, Deprivation, and*  
7 *Economic Mobility*. Emerald Group Publishing Limited, pp. 23–70.
- 8 Arnason, A. N. 1972. Parameter estimates from mark-recapture experiments on two  
9 populations subject to migration and death. - *Res. Popul. Ecol.* 13: 97–113.
- 10 Arnason, A. N. 1973. The estimation of population size, migration rates and survival in a  
11 stratified population. - *Res. Popul. Ecol.* 15: 1–8.
- 12 Aubry, L. M. et al. 2011. Drivers of age-specific survival in a long-lived seabird:  
13 Contributions of observed and hidden sources of heterogeneity. - *J. Anim. Ecol.* 80: 375–  
14 383.
- 15 Authier, M. et al. 2017. Wolf in sheep’s clothing: Model misspecification undermines tests of  
16 the neutral theory for life histories. - *Ecol. Evol.*: In press.
- 17 Barbraud, C. and Weimerskirch, H. 2004. Modelling the effects of environmental and  
18 individual variability when measuring the costs of first reproduction. - *Anim. Biodivers.*  
19 *Conserv.* 27: 109–111.
- 20 Barbraud, C. et al. 2005. Environmental conditions and breeding experience affect costs of  
21 reproduction in blue petrels. – *Ecology* 86: 682–692.
- 22 Barbraud, C. et al. 2013. Fisheries Bycatch as an Inadvertent Human-Induced Evolutionary

- 1 Mechanism. - Plos One 8: e60353.
- 2 Baudisch, A. and Vaupel, J. W. 2012. Evolution. Getting to the root of aging. - Science 338:  
3 618–9.
- 4 Beauplet, G. et al. 2006. Age-specific survival and reproductive performances in fur seals:  
5 evidence of senescence and individual quality. – Oikos 112: 430-441.
- 6 Berger, V. et al. 2015. Early and adult social environments have independent effects on  
7 individual fitness in a social vertebrate. - Proc. Biol. Sci. 282: 20151167.
- 8 Blomberg, E. J. et al. 2013. Seasonal reproductive costs contribute to reduced survival of  
9 female greater sage-grouse. - J. Avian Biol. 44: 149-158.
- 10 Blums, P. et al. 2005. Individual quality, survival variation and patterns of phenotypic  
11 selection on body condition and timing of nesting in birds. - Oecologia 143: 365-376.
- 12 Bolker, B. M. et al. 2009. Generalized linear mixed models: a practical guide for ecology and  
13 evolution. - Trends Ecol. Evol. 24: 127–135.
- 14 Bolnick, D. I. et al. 2011. Why intraspecific trait variation matters in community ecology. -  
15 Trends Ecol. Evol. 26: 183–192.
- 16 Bonenfant, C. et al. 2009. Age-dependent relationship between horn growth and survival in  
17 wild sheep. – J. Anim. Ecol. 78: 161-171.
- 18 Bonner, S. J. and Schwarz, C. J. 2006. An extension of the Cormack-Jolly-Seber model for  
19 continuous covariates with application to *Microtus pennsylvanicus*. - Biometrics 62:  
20 142–149.
- 21 Bonner, S. J. et al. 2010. Continuous covariates in mark-recapture-recovery analysis: a

- 1 comparison of methods. - *Biometrics* 66: 1256–1265.
- 2 Bonnet, T. and Postma, E. 2016. Successful by Chance? The Power of Mixed Models and  
3 Neutral Simulations for the Detection of Individual Fixed Heterogeneity in Fitness  
4 Components. - *Am. Nat.* 187: 60–74.
- 5 Borchers, D. 2012. A non-technical overview of spatially explicit capture-recapture models. -  
6 *J. Ornithol.* 152: 435–444.
- 7 Bouwhuis, S. et al. 2012. The forms and fitness cost of senescence: Age-specific recapture,  
8 survival, reproduction, and seproductive value in a wild bird population. - *Am. Nat.* 179:  
9 E15–E27.
- 10 Briggs, C. W. et al. 2011. Correlates of survival in Swainson's hawks breeding in Northern  
11 California. - *J. Wildl. Manage.* 75: 1307-1314.
- 12 Buoro, M. et al. 2010. Investigating evolutionary trade-offs in wild populations of atlantic  
13 salmon (*salmo salar*): incorporating detection probabilities and individual heterogeneity.  
14 - *Evolution.* 64: 2629–42.
- 15 Buoro, M. et al. 2011. Assessing adaptive phenotypic plasticity by means of conditional  
16 strategies from empirical data: The latent environmental threshold model. - *Evolution.*  
17 66: 996–1009.
- 18 Burnham, K. P. and Overton, W. S. 1979. Robust estimation of population size when capture  
19 probabilities vary among animals. - *Ecology* 60: 927–936.
- 20 Burnham, K. P. and Rexstad, E. A. 1993. Modeling heterogeneity in survival rates of banded  
21 waterfowl. - *Biometrics* 49: 1194–1208.
- 22 Burnham, K. P. and Anderson, D. R. 2002. Model selection and multimodel inference: A

- 1 practical information-theoretic approach. - Springer.
- 2 Cam, E. et al. 1998. Are adult nonbreeders prudent parents? The Kittiwake model. - Ecology  
3 79: 2917–2930.
- 4 Cam, E. and Monnat, J. Y. 2000a. Stratification based on reproductive state reveals  
5 contrasting patterns of age-related variation in demographic parameters in the kittiwake.  
6 – Oikos 90: 560-574.
- 7 Cam, E. and Monnat, J. Y. 2000b. Apparent inferiority of first-time breeders in the kittiwake:  
8 the role of heterogeneity among age classes. – J. Anim. Ecol. 69: 380-394.
- 9 Cam, E. et al. 2002a. Individual covariation in life-history traits: Seeing the trees despite the  
10 forest. – Am. Nat. 159: 96-105.
- 11 Cam, E. et al. 2002b. Influence of behavioural tactics on recruitment and reproductive  
12 trajectory in the kittiwake. – L. Appl. Stat. 29: 163-185.
- 13 Cam, E. et al. 2003. Long-term fitness consequences of early conditions in the kittiwake. – J.  
14 Anim. Ecol. 72: 411-424.
- 15 Cam, E. et al. 2013. Looking for a needle in a haystack: inference about individual fitness  
16 components in a heterogeneous population. - Oikos 122: 739–753.
- 17 Cam, E. et al. 2016. The Conundrum of Heterogeneities in Life History Studies. - Trends  
18 Ecol. Evol. 31: 872–886.
- 19 Carothers, A. D. 1973. The Effects of Unequal Catchability on Jolly-Seber Estimates. -  
20 Biometrics 29: 79–100.
- 21 Caswell, H. 2009. Stage, age and individual stochasticity in demography. - Oikos 118: 1763–

- 1        1782.
- 2    Catchpole, E. A. et al. 2010. A new method for analysing discrete life history data with  
3        missing covariate values. - J. R. Stat. Soc. - Ser. B Stat. Methodol. 70: 445–460.
- 4    Caughley, G. 1966. Mortality patterns in mammals. - Ecology 47: 906–918.
- 5    Chamberlain, G. 1979. Heterogeneity, omitted variable bias, and duration dependence.  
6        Discussion Paper No. 691. - Harvard Institute of Economic Research, Harvard  
7        University.
- 8    Chambert, T. et al. 2013. Individual heterogeneity in reproductive rates and cost of  
9        reproduction in a long-lived vertebrate. - Ecol. Evol. 3: 2047–2060.
- 10   Chambert, T. et al. 2014. Use of posterior predictive checks as an inferential tool for  
11        investigating individual heterogeneity in animal population vital rates. - Ecol. Evol. 4:  
12        1389–1397.
- 13   Chambert, T. et al. 2015. Female Weddell seals show flexible strategies of colony attendance  
14        related to varying environmental conditions. – Ecology 96: 479-488.
- 15   Chao, A. 1987. Estimating the population size for capture-recapture data with unequal  
16        catchability. – Biometrics: 783-791.
- 17   Choquet, R. et al. 2009. Program E - SURGE  $\square$ : A Software Application for Fitting  
18        Multievent Models. - In: Thomson, D. L. et al. (eds), Environmental and Ecological  
19        Statistics. Springer US, pp. 845–865.
- 20   Choquet, R. et al. 2013. Estimating demographic parameters from capture-recapture data with  
21        dependence among individuals within clusters. - Methods Ecol. Evol. 4: 474–482.
- 22   Clutton-Brock, T. H. 1988. Reproductive Success. Studies of Individual Variation in



- 1        Contrasting Breeding Systems. - University of Chicago Press.
- 2        Clutton-Brock, T. and Sheldon, B. C. 2010. Individuals and populations: the role of long-  
3        term, individual-based studies of animals in ecology and evolutionary biology. - Trends  
4        Ecol. Evol. 25: 562–573.
- 5        Cody, M. L. 1966. A general theory of clutch size. - Evolution. 20: 174–184.
- 6        Cohen, J. 1986. An uncertainty principle in demography and the unisex issue. - Am. Stat. 40:  
7        32–39.
- 8        Conner, M. M. and White, G. C. 1999. Effects of individual heterogeneity in estimating the  
9        persistence of small populations. - Nat. Resour. Model. 12: 109–127.
- 10       Conroy, M. J. 2009. Application of capture–recapture to addressing questions in evolutionary  
11       ecology. In Thomson et al. (eds) *Modeling demographic processes in marked*  
12       *populations, Environmental and Ecological Statistics* (pp. 131-152). Springer US.
- 13       Cooch, E. G. et al. 2002. Occam’s shadow: levels of analysis in evolutionary ecology - where  
14       to next? - J. Appl. Stat. 29: 19–48.
- 15       Cormack, R. M. 1964. Estimates of survival from the sighting of marked animals. -  
16       Biometrika 51: 429–438.
- 17       Coull, B. and Agresti, A. 1999. The use of mixed logit models to reflect heterogeneity in  
18       capture–recapture studies. - Biometrics 55: 294–301.
- 19       Coulson, T. et al. 2011. Modeling Effects of Environmental change on wolf population  
20       dynamics, trait evolution, and life history. - Science. 334: 1275–1278.
- 21       Crespin, L. et al. 2008. Is heterogeneity of catchability in capture-recapture studies a mere

- 1        sampling artifact or a biologically relevant feature of the population? - *Popul. Ecol.* 50:  
2        247–256.
- 3    Cubaynes, S. et al. 2010. Importance of Accounting for Detection Heterogeneity When  
4        Estimating Abundance: the Case of French Wolves. - *Conserv. Biol.* 24: 621–626.
- 5    Cubaynes, S. et al. 2012a. Testing hypotheses in evolutionary ecology with imperfect  
6        detection: Structural equation modeling of mark-recapture data. - *Ecology* in press.
- 7    Cubaynes, S. et al. 2012b. Assessing individual heterogeneity using model selection criteria:  
8        how many mixture components in capture-recapture models? - *Methods Ecol. Evol.* 3:  
9        564–573.
- 10   Descamps, S. et al. 2009. Costs of reproduction in a long-lived bird: large clutch size is  
11        associated with low survival in the presence of a highly virulent disease. - *Biol. Lett.* 5:  
12        278–281.
- 13   Desprez, M. et al. 2013. Known unknowns in an imperfect world: incorporating uncertainty in  
14        recruitment estimates using multi-event capture-recapture models. - *Ecol. Evol.* 3: 4658–  
15        4668.
- 16   Dingemans, N. J. and Doehrmann, N. A. 2013. Quantifying individual variation in  
17        behaviour: Mixed-effect modelling approaches. - *J. Anim. Ecol.* 82: 39–54.
- 18   Dobzhansky, T. 1973. Nothing in Biology Makes Sense except in the Light of Evolution. -  
19        *Am. Biol. Teach.* 35: 125–129.
- 20   Douhard, M. et al. 2014. Fitness consequences of environmental conditions at different life  
21        stages in a long-lived vertebrate. - *Proc. R. Soc. B* 281: 20140276.
- 22   Drummond, H. et al. 2011. Natural “poor start” does not increase mortality over the lifetime. -

- 1 Proc. R. Soc. B Biol. Sci. 278: 3421–3427.
- 2 Duffie, D. et al. 2009. Frailty correlated default. - J. Finance 64: 2089–2123.
- 3 Eberhardt, L. L. 1969. Population Estimates from Recapture Frequencies. - J. Wildl. Manage.
- 4 33: 28–39.
- 5 Efford, M. 2004. Density estimation in live-trapping studies. - Oikos 106: 598-610.
- 6 Emlen, J. M. 1970. Age Specificity and Ecological Theory. - Ecology 51: 588.
- 7 Enki, D. G. et al. 2014. A time-varying shared frailty model with application to infectious
- 8 diseases. - Ann. Appl. Stat. 8: 430–447.
- 9 Estes, J. A. et al. 2003. Individual variation in prey selection by sea otters: Patterns, causes
- 10 and implications. - J. Anim. Ecol. 72: 144–155.
- 11 Falconer, D.S. 1967. The inheritance of liability to diseases with variable age of onset, with
- 12 particular reference to diabetes mellitus. - Ann. Hum. Genet. 31: 1–20
- 13 Farcomeni, A. and Tardella, L. 2010. Reference Bayesian methods for recapture models with
- 14 heterogeneity. - Test 19: 187-208.
- 15 Fay, R. et al. 2016a. Variation in the age of first reproduction: different strategies or
- 16 individual quality? - Ecology 97: 1842–1851.
- 17 Fay, R. et al. 2016b. Paternal but not maternal age influences early-life performance of
- 18 offspring in a long-lived seabird. - Proc. R. Soc. B 283: 20152318.
- 19 Festa-Bianchet, M. et al. 1998. Mass- and density-dependent reproductive success and
- 20 reproductive costs in a capital breeder. - Am. Nat. 152: 367–379.

- 1 Fletcher, D. et al. 2012. Bias in estimation of adult survival and asymptotic population growth  
2 rate caused by undetected capture heterogeneity. - *Methods Ecol. Evol.* 3: 206–216.
- 3 Ford, J. H. et al. 2015. Modelling latent individual heterogeneity in mark-recapture data with  
4 Dirichlet process priors. arXiv:1511.07103v1. <https://arxiv.org/abs/1511.07103>
- 5 Fox, G. A. et al. 2006. Consequences of heterogeneity in survival probability in a population  
6 of Florida scrub-jays. - *J. Anim. Ecol.* 75: 921–927.
- 7 Garnier, A. et al. 2016. What shapes fitness costs of reproduction in long-lived iteroparous  
8 species? A case study on the Alpine ibex. - *Ecology* 97: 205-214.
- 9 Gelman, A. et al. 2014. Understanding predictive information criteria for Bayesian models. -  
10 *Stat. Comput.* 24: 997–1016.
- 11 Gershman, S. J. and Blei, D. M. 2012. A tutorial on Bayesian nonparametric models. - *J.*  
12 *Math. Psychol.* 56: 1–12.
- 13 Ghosh, S. K. and Norris, J. L. 2005. Bayesian capture-recapture analysis and model selection  
14 allowing for heterogeneity and behavioral effects. - *J. Agric. Biol. Environ. Stat.* 10: 35–  
15 49.
- 16 Gimenez, O. and Choquet, R. 2010. Individual heterogeneity in studies on marked animals  
17 using numerical integration: capture-recapture mixed models. - *Ecology* 91: 951–957.
- 18 Gimenez, O. et al. 2007. State-space modelling of data on marked individuals. - *Ecol. Modell.*  
19 206: 431–438.
- 20 Gimenez, O. et al. 2008. The risk of flawed inference in evolutionary studies when  
21 detectability is less than one. - *Am. Nat.* 172: 441–8.
- 22 Gimenez, O. et al. 2009. Estimating and visualizing fitness surfaces using mark-recapture

- 1 data. - *Evolution*. 63: 3097–105.
- 2 Gimenez, O. et al. 2012. Estimating demographic parameters using hidden process dynamic  
3 models. - *Theor. Popul. Biol.* 82: 307–16.
- 4 Green, R. F. 1977. Do more birds produce fewer young? A comment on Mayfield's measure  
5 of nest success. - *Wilson Bull.* 89: 173–175.
- 6 Guéry, L. et al. 2017. Hidden survival heterogeneity of three common eider populations in  
7 response to climate fluctuations. - *J. Anim. Ecol.* (in press).
- 8 Gullett, P., Evans, K. L., Robinson, R. A., and Hatchwell, B. J. 2014. Climate change and  
9 annual survival in a temperate passerine: partitioning seasonal effects and predicting  
10 future patterns. - *Oikos* 123: 389-400.
- 11 Hadley, G. L. et al. 2007. Evaluation of reproductive costs for Weddell seals in Erebus Bay,  
12 Antarctica. - *J. Anim. Ecol.* 76: 448–458.
- 13 Hamel, S. et al. 2009. Individual variation in reproductive costs of reproduction: High-quality  
14 females always do better. - *J. Anim. Ecol.* 78: 143–151.
- 15 Hamel, S. et al. 2014. A standardized approach to estimate life history tradeoffs in  
16 evolutionary ecology. - *Oikos* 123: 151–160.
- 17 Hamel, S. et al. 2016. Cohort variation in individual body mass dissipates with age in large  
18 herbivores. - *Ecol. Monogr.* 86: 517–543.
- 19 Hartson, R. B. et al. 2015. Competitive release modifies the impacts of hydrologic alteration  
20 for a partially migratory stream predator. - *Ecol. Fresh. Fish.* 24: 276-292.

- 1 Heckman, J. J., and Willis, R. J. 1977. A beta-logistic model for the analysis of sequential  
2 labor force participation by married women. - J. Polit. Econ. 85: 27-58.
- 3 Heckman, J. J., and Borjas, G. J. 1980. Does unemployment cause future unemployment?  
4 Definitions, questions and answers from a continuous time model of heterogeneity and  
5 state dependence. - *Economica* 47: 247-283.
- 6 Heckman, J. J. 1981. The Incidental Parameters Problem and the Problem of Initial  
7 Conditions in Estimating: A Discrete Time-discrete Data Stochastic Process and Some  
8 Monte Carlo Evidence. - Graduate School of Business and Department of Economics,  
9 University of Chicago, 1979.
- 10 Hernandez-Matias, A. et al. 2011. Effects of age, territoriality and breeding on survival of  
11 Bonelli's Eagle *Aquila fasciata*. - *Ibis* 153: 846-857.
- 12 Hestbeck, J. B. et al. 1991. Estimates of movement and site fidelity using mark-resight data of  
13 wintering canada geese. - *Ecology* 72: 523-533.
- 14 Hileman, E. T. et al. 2015. Recouping lost information when mark-recapture data are pooled:  
15 A case study of milksnakes (*Lampropeltis triangulum*) in the Upper Midwestern United  
16 States. - *J. Herpetol.* 49: 428-436.
- 17 Hooten, M. B. et al. 2015. A guide to Bayesian model selection for ecologists. - *Ecol.*  
18 *Monogr.* 85: 3-28.
- 19 Horswill, C. et al. 2014. Survival in macaroni penguins and the relative importance of  
20 different drivers: individual traits, predation pressure and environmental variability. - *J.*  
21 *Anim. Ecol.* 83: 1057-1067.
- 22 Hougaard, P. 1984. Life table methods for heterogeneous populations: Distributions

- 1       describing the heterogeneity. - *Biometrika* 71: 75–83.
- 2   Hougaard, P. 1991. Modelling Heterogeneity in Survival Data. - *J. Appl. Probab.* 28: 695–
- 3       701.
- 4   Hougaard, P. 1995. Frailty models for survival data. - *Lifetime Data Anal.* 1: 255–273.
- 5   Hua, D. et al. 2015. Use of PIT tags to assess individual heterogeneity of laboratory-reared
- 6       juveniles of the endangered Cumberlandian combshell (*Epioblasma brevidens*) in a
- 7       mark-recapture study. - *Ecol. Evol.* 5: 1076-1087.
- 8   Johnson, D. H. 1979. Estimating Nest Success: The Mayfield Method and an Alternative. -
- 9       *Auk* 96: 651–661.
- 10   Johnson, D. H. et al. 1986. The role of heterogeneity in animal population dynamics. - *Proc.*
- 11       Thirteen. *Int. Biometrics Conf. Sess. 5*, Seattle, June 1985
- 12   Johnson, D. S. et al. 2016. Multivariate State Hidden Markov Models for Mark-Recapture
- 13       Data. - *Stat. Sci.* 31: 233–244.
- 14   Jolly, G. M. 1965. Explicit estimates from capture-recapture data with both death and
- 15       immigration-stochastic model. - *Biometrika* 52: 225–247.
- 16   Kannisto, V. 1991. Frailty and survival. - *Genus* 47: 101–118.
- 17   Kaplan, D. 2008. An overview of Markov chain methods for study of stage-sequential
- 18       developmental processes. - *Dev. Psychol.* 44: 457–467.
- 19   Kendall, B. E. and Fox, G. A. 2002. Variation among individuals and reduced demographic
- 20       stochasticity. - *Conserv. Biol.* 16: 109–116.
- 21   Kendall, W. L. et al. 2003. Adjusting multistate capture–recapture models for

- 1 misclassification bias: manatee breeding proportions. - Ecology 84: 1058–1066.
- 2 Kendall, B. E. et al. 2011. Demographic heterogeneity, cohort selection, and population  
3 growth. - Ecology 92: 1985–1993.
- 4 Kennamer, R. A. et al. 2016. Effects of current reproductive success and individual  
5 heterogeneity on survival and future reproductive success of female Wood Ducks. – Auk  
6 133: 439-450.
- 7 Keyfitz, N. and Littman, G. 1979. Mortality in a heterogeneous population. - Popul. Stud. 33:  
8 333–342.
- 9 King, R. 2012. A Review of Bayesian State-Space Modelling of Capture-Recapture-Recovery  
10 Data. - Interface Focus 2: 190–204.
- 11 Knape, J. et al. 2011. Individual heterogeneity and senescence in Silvereyes on Heron Island.  
12 - Ecology 92: 813–820.
- 13 Koenig, W. D. et al. 1995. Patterns and consequences of egg destruction among joint-nesting  
14 acorn woodpeckers. - Anim. Behav. 50: 607–621.
- 15 Koons, D. N. et al. 2014. Methods for studying cause-specific senescence in the wild. - Meth.  
16 Ecol. Evol. 5: 924-933.
- 17 Kovach, R. P. et al. 2010. Strong influence of microhabitat on survival for an intertidal snail,  
18 *Nucella lima*. – Hydrobiologia 652: 49-56.
- 19 Kramer, G. H. 1983. The Ecological Fallacy Revisited: Aggregate- versus Individual-level  
20 Findings on Economics and Elections, and Sociotropic Voting. – Am. Polit. Sci. Rev. 77:  
21 92–111.
- 22 Laake, J. L. 2013. RMark: An R interface for analysis of capture-recapture data with MARK.



- 1 - AFSC Process. Rep. 2013-01 2013–1: 25.
- 2 Laake, J. L. et al. 2013. marked: an R package for maximum likelihood and Markov Chain  
3 Monte Carlo analysis of capture–recapture data. – *Methods Ecol. Evol.*, 4: 885–890.
- 4 Langrock, R. and King, R. 2013. Maximum likelihood estimation of mark–recapture–  
5 recovery models in the presence of continuous covariates. – *The Ann. of Appl. Stat.* 7:  
6 1709–1732.
- 7 Le Bohec, C. et al. 2007. Population dynamics in a long-lived seabird: I. Impact of breeding  
8 activity on survival and breeding probability in unbanded king penguins. – *J. Anim.*  
9 *Ecol.* 76: 1149-1160.
- 10 Lebreton, J.-D. and Pradel, R. 2002. Multistate recapture models: Modelling incomplete  
11 individual histories. - *J. Appl. Stat.* 29: 353–369.
- 12 Lebreton, J.-D. et al. 1992. Modeling survival and testing biological hypotheses using marked  
13 animals: a unified approach with case studies. - *Ecol. Monogr.* 62: 67–118.
- 14 Lebreton, J.-D. et al. 2009. Modeling Individual Animal Histories with Multistate Capture-  
15 Recapture Models. - *Adv. Ecol. Res.* 41: 87–173.
- 16 Lee, D. E. 2011. Effects of environmental variability and breeding experience on northern  
17 elephant seal demography. – *J. Mamm.* 92: 517-526.
- 18 Lee, S. et al. 2016. Estimation in Closed Capture – Recapture Models When Covariates Are  
19 Missing at Random. – *Biometrics* 72: 1294–1304
- 20 Lemaître, J.-F. et al. 2015. Early-late life trade-offs and the evolution of ageing in the wild. –  
21 *Proc. Biol. Sci.* 282: 20150209.

- 1 Lescroël, A. et al. 2009. Effects of individual quality, reproductive success and environmental  
2 variability on survival of a long-lived seabird. – *J. Anim. Ecol.* 78: 798-806.
- 3 Lindberg, M. S. et al. 2013. Individual heterogeneity in black brant survival and recruitment  
4 with implications for harvest dynamics. – *Ecol. Evol.* 3: 4045-4056.
- 5 Link, W. A. 2003. Nonidentifiability of population size from capture-recapture data with  
6 heterogeneous detection probabilities. – *Biometrics* 59: 1123–1130.
- 7 Link, W. A. 2004. Individual heterogeneity and identifiability in capture-recapture models. -  
8 *Anim. Biodivers. Conserv.* – 27: 87–91.
- 9 Link, W. A. and Hesed, K. M. 2015. Individual heterogeneity in growth and age at sexual  
10 maturity: A Gamma process analysis of Capture-Mark-Recapture data. - *J. Agric. Biol.*  
11 *Environ. Stat.* – 20: 343-352.
- 12 Loison, A. et al. 1999. Age-specific survival in five populations of ungulates: Evidence of  
13 senescence. – *Ecology* 80: 2539–2554.
- 14 Lomnicki, A. 1978. Individual differences between animals and the natural regulation of their  
15 numbers. - *J. Anim. Ecol.* 47: 461–475.
- 16 Lynch, M. and Walsh, B. 1998. Genetics and analysis of quantitative traits.
- 17 Manda, S. O. M. and Meyer, R. 2005. Bayesian inference for recurrent events data using  
18 time-dependent frailty. - *Stat. Med.* 24: 1263–1274.
- 19 Maniscalco, J. M. et al. 2010. High natality rates of endangered Steller sea lions in Kenai  
20 fjords, Alaska and perceptions of population status in the Gulf of Alaska. - *Plos One* 5:  
21 e10076.
- 22 Manly, B. F. J. and Parr, M. J. 1968. A new method for estimating population size,

- 1 survivorship, and birth rate from capture-recapture data. - *Trans. Soc. Br. Entomol.* 18:  
2 81–89.
- 3 Manrique-Vallier, D. 2016. Bayesian population size estimation using Dirichlet process  
4 mixtures. - *Biometrics* 72: 1246-1254.
- 5 Manton, K. G. et al. 1981. Methods for comparing the mortality experience of heterogeneous  
6 populations. - *Demography* 18: 389–410.
- 7 Manton, K. G. et al. 1986. Alternative models for the heterogeneity of mortality risks among  
8 the aged. - *J. Am. Stat. Assoc.* 81: 635–644.
- 9 Maescot, L. et al. 2011. Capture – recapture population growth rate as a robust tool against  
10 detection heterogeneity for population management. - *Ecol. Appl.* 21: 2898–2907.
- 11 Marzolin, G. et al. 2011. Frailty in state-space models: application to actuarial senescence in  
12 the Dipper. - *Ecology* 92: 562–567.
- 13 Matechou, E. et al. 2016. Bayesian analysis of Jolly-Seber type models Incorporating  
14 heterogeneity in arrival and departure. - *Environ. Ecol. Stat.* 23: 531–547.
- 15 Mcloughlin, P. D. et al. 2007. Lifetime reproductive success and composition of the home  
16 range in a large herbivore. - *Ecology* 88: 3192–3201.
- 17 McNamara, J. M. and Houston, A. I. 1996. State-dependent life histories. - *Nature* 380: 215–  
18 221.
- 19 Millon, A. et al. 2010. Pulsed resources affect the timing of first breeding and lifetime  
20 reproductive success of tawny owls. - *J. Anim. Ecol.* 79: 426-435.
- 21 Morano, S. et al. 2013. Life-history strategies of North American elk: trade-offs associated

- 1 with reproduction and survival. - J. Mamm. 94: 162-172.
- 2 Morgan, B. J. T. and Ridout, M. S. 2008. A new mixture model for capture heterogeneity. - J.  
3 R. Stat. Soc. Ser. C Appl. Stat. 57: 433–446.
- 4 Moyes, K. et al. 2011. Individual differences in reproductive costs examined using multi-state  
5 methods. - J. Anim. Ecol. 80: 456-465.
- 6 Nevoux, M. et al. 2007. Environmental variation and experience-related differences in the  
7 demography of the long-lived black-browed albatross. - J. Anim. Ecol. 76: 159–167.
- 8 Newton, I. 1989. Lifetime reproduction in birds. - Academic Press.
- 9 Nichols, J. D. 2002. Discussion comments on: “Occam’ s shadow: levels of analysis in  
10 evolutionary ecology – where to next?” by Cooch, Cam and Link. - J. Appl. Stat. in  
11 press.
- 12 Nichols, J. D. and Kendall, W. L. 1995. The use of multi-state capture-recapture models to  
13 address questions in evolutionary ecology. - J. Appl. Stat. 22: 835–846.
- 14 Nichols, J. D. et al. 1992. Estimating transition probabilities for stage-based population  
15 projection matrices using capture–recapture data. - Ecology 73: 306–312.
- 16 Nichols, J. D. et al. 1994. Estimating breeding proportions and testing hypotheses about costs  
17 of reproduction with capture-recapture data. - Ecology 75: 2052–2065.
- 18 Nicolai, C. A. and Sedinger, J. S. 2012. Trade-offs between offspring fitness and future  
19 reproduction of adult female black brent. - J. Anim. Ecol. 81: 798–805.
- 20 Norris, J. L. and Pollock, K. H. 1996. Nonparametric MLE under two closed capture  
21 recapture models with heterogeneity. - Biometrics 52: 639–649.

- 1 North, P. M. and Morgan, B. J. T. 1979. Modeling heron survival using weather data. -  
2 Biometrics 35: 667–681.
- 3 Nussey, D. H. et al. 2008. Measuring senescence in wild animal populations: Towards a  
4 longitudinal approach. - *Funct. Ecol.* 22: 393–406.
- 5 Nussey, D. H. et al. 2013. Senescence in natural populations of animals: Widespread evidence  
6 and its implications for bio-gerontology. - *Ageing Res. Rev.* 12: 214–225.
- 7 O’Hara, R. B. and Sillanpää, M. J. 2009. A review of bayesian variable selection methods:  
8 What, how and which. - *Bayesian Anal.* 4: 85–118.
- 9 Ohlssen, D. I. et al. 2007. Flexible random-effects models using Bayesian semi-parametric  
10 models: Applications to institutional comparisons. - *Stat. Med.* 26: 2088–2112.
- 11 Oliver, L. J. et al. 2011. Individual heterogeneity in recapture probability and survival  
12 estimates in cheetah. - *Ecol. Modell.* 222: 776–784.
- 13 Orzack, S. H. et al. 2011. Static and dynamic expression of life history traits in the northern  
14 fulmar *Fulmarus glacialis*. - *Oikos* 120: 369–380.
- 15 Otis, D. L. et al. 1978. Statistical Inference from Capture Data on Closed Animal Populations.  
16 - *Wildl. Monogr.* 62: 3–135.
- 17 Papaïx, J. et al. 2010. Combining capture-recapture data and pedigree information to assess  
18 heritability of demographic parameters in the wild. - *J. Evol. Biol.* 23: 2176–2184.
- 19 Pennell, M. L. and Dunson, D. B. 2006. Bayesian semiparametric dynamic frailty models for  
20 multiple event time data. - *Biometrics* 62: 1044–1052.
- 21 Péron, G. et al. 2010. Capture-recapture models with heterogeneity to study survival

- 1 senescence in the wild. - *Oikos* 119: 524–532.
- 2 Péron, G. et al. 2016. Evidence of reduced individual heterogeneity in adult survival of long-  
3 lived. - *Evolution*. 70: 2909–2914.
- 4 Pirotta, E. et al. 2015. Estimating spatial, temporal and individual variability in dolphin  
5 cumulative exposure to boat traffic using spatially explicit capture-recapture methods.  
6 *Anim. Cons.* - 18: 20-31.
- 7
- 8 Pistorius, P. A. et al. 2008. Seasonal survival and the relative cost of first reproduction in  
9 adult female southern elephant seals. – *J. Mamm.* 89: 567-574.
- 10 Plard, F. et al. 2012. Modeling reproductive trajectories of roe deer females: Fixed or dynamic  
11 heterogeneity? - *Theor. Popul. Biol.* 82: 317–328.
- 12 Plard, F. et al. 2015. Quantifying the influence of measured and unmeasured individual  
13 differences on demography. - *J. Anim. Ecol.* 84: 1434–45.
- 14 Pledger, S. 2000. Unified maximum likelihood estimates for closed capture-recapture models  
15 using mixtures. - *Biometrics* 56: 434–442.
- 16 Pledger, S. 2005. The performance of mixture models in heterogeneous closed population  
17 capture-recapture. - *Biometrics* 61: 868–873.
- 18 Pledger, S. and Schwarz, C. J. 2002. Modelling heterogeneity of survival in band-recovery  
19 data using mixtures. - *J. Appl. Stat.* 29: 315–327.
- 20 Pledger, S. and Phillpot, P. 2008. Using mixtures to model heterogeneity in ecological  
21 capture-recapture studies. - *Biometrical J.* 50: 1022–1034.

- 1 Pledger, S. et al. 2003. Open Capture-Recapture Models with Heterogeneity: I. Cormack-  
2 Jolly-Seber Model. - *Biometrics* 59: 786–794.
- 3 Pledger, S. et al. 2010. Open capture-recapture models with heterogeneity: II. Jolly-Seber  
4 model. - *Biometrics* 66: 883–890.
- 5 Plum, A. and Ayllón, S. 2015. Heterogeneity in unemployment state dependence. - *Econ.*  
6 *Lett.* 136: 85–87.
- 7 Plummer, M. 2003. JAGS: A program for analysis of Bayesian graphical models using Gibbs  
8 sampling (K Hornik, F Leisch, and A Zeileis, Eds.). - *Proc. 3rd Int. Work. Distrib. Stat.*  
9 *Comput.* March 2022: 0.
- 10 Pollock, K. H. 1980. Capture-recapture models: a review of current methods, assumptions and  
11 experimental design. - No. 1308
- 12 Pollock, K. H. 1981. Capture-recapture models allowing for age-dependent survival and  
13 capture rates. - *Biometrics* 37: 521–529.
- 14 Pollock, K. H. 2002. The use of auxiliary variables in capture-recapture modelling: an  
15 overview. - *J. Appl. Stat.* 29: 85–102.
- 16 Pollock, K. H. et al. 1990. *Statistical Inference for Capture-Recapture Experiments.* - *Source*  
17 *Wildl. Monogr.*: 3–97.
- 18 Pradel, R. 2005. Multievent: an extension of multistate capture-recapture models to uncertain  
19 states. - *Biometrics* 61: 442–7.
- 20 Pradel, R. 2009. The Stakes of Capture–Recapture Models with State Uncertainty. - In:  
21 *Modeling Demographic Processes In Marked Populations.* pp. 781–795.

- 1 Pradel, R. et al. 2010. Estimating population growth rate from capture-recapture data in  
2 presence of capture heterogeneity. - J. Agric. Biol. Environ. Stat. 15: 248–258.
- 3 Pradel, R. et al. 2012. Breeding Experience Might Be a Major Determinant of Breeding  
4 Probability in Long-Lived Species: The Case of the Greater Flamingo. - Plos One 7:  
5 e51016.
- 6 Prowse, V. 2012. Modeling Employment Dynamics With State Dependence and Unobserved  
7 Heterogeneity. - J. Bus. Econ. Stat. 30: 411–431.
- 8 Putter, H. and Van Houwelingen, H. C. 2014. Dynamic frailty models based on compound  
9 birth-death processes. - Biostatistics 16: 550–564.
- 10 Raman, S. et al. 2010. Infinite mixture-of-experts model for sparse survival regression with  
11 application to breast cancer. - BMC Bioinformatics 11 Suppl 8: S8.
- 12 Rasmussen, C. E. C. E. 2000. The infinite Gaussian mixture model. - Adv. Neural Inf.  
13 Process. Syst. 12: 554–560.
- 14 Reichert, B. E. et al. 2012. Extreme weather and experience influence reproduction in an  
15 endangered bird. – Ecology 93: 2580-2589.
- 16 Reid, J. M. et al. 2003. Age-specific reproductive performance in red-billed choughs  
17 *Pyrrhonorax pyrrhonorax*: patterns and processes in a natural population. – J. Anim.  
18 Ecol. 72: 765-776.
- 19 Reid, J. M. et al. 2010. Parent age, lifespan and offspring survival: structured variation in life  
20 history in a wild population. - J. Anim. Ecol. 79: 851-862.
- 21 Røystad, E. A. and Anderson, D. R. 1992. Heterogeneous Survival Rates of Mallards (*Anas-*  
22 *Platyrhynchos*). - Can. J. Zool. 70: 1878–1885.



- 1 Reznick, D. 1985. Costs of Reproduction: An Evaluation of the Empirical Evidence. - *Oikos*
- 2 44: 257–267.
- 3 Robert, A. et al. 2012. The interaction between reproductive cost and individual quality is
- 4 mediated by oceanic conditions in a long-lived bird. – *Ecology* 93: 1944-1952.
- 5 Roff, D. A. 1992. *The evolution of life histories: theory and analysis*. - Chapman and Hall.
- 6 Rouan, L. et al. 2009. Estimation of lifetime reproductive success when reproductive status
- 7 cannot always be assessed. - *Model. Demogr. Process. Mark. Popul.*: 867–879.
- 8 Roulin, A. et al. 2003. Female colour polymorphism covaries with reproductive strategies in
- 9 the tawny owl *Strix aluco*. – *J. Avian Biol.* 34: 393-401.
- 10 Royle, J. A. 2008. Modeling individual effects in the Cormack-Jolly-Seber model: A state-
- 11 space formulation. - *Biometrics* 64: 364–370.
- 12 Sanz-Aguilar, A. et al. 2008. The cost of reproduction and experience-dependent vital rates in
- 13 a small petrel. - *Ecology* 89: 3195–3203.
- 14 Sanz-Aguilar, A. et al. 2011. Studying the reproductive skipping behavior in long-lived birds
- 15 by adding nest inspection to individual-based data. - *Ecol. Appl.* 21: 555–564.
- 16 Sauer, J. R. and Slade, N. A. 1987. Uinta ground squirrel demography: is body mass a better
- 17 categorical variable than age? - *Ecology* 68: 642–650.
- 18 Schwarz, C. J. 2001. The Jolly-seber model: More than just abundance. - *J. Agric. Biol.*
- 19 *Environ. Stat.* 6: 195–205.
- 20 Schwarz, C. J. et al. 1993. Estimating migration rates using tag-recovery data. - *Biometrics*
- 21 49: 177–193.

- 1 Seber, G. A. F. 1965. A note on the multiple-recapture census. - *Biometrika* 52: 249–259.
- 2 Sedinger, J. S. et al. 2008. Fidelity and breeding probability related to population density and  
3 individual quality in black brent geese *Branta bernicla nigricans*. – *J. Anim. Ecol.* 77:  
4 702-712.
- 5 Senner, N. et al. 2015. An ontogenetic perspective on individual differences. - *Proc. R. Soc. B*  
6 282: 20151050.
- 7 Short, R. V. and Balaban, E. 1994. *The Differences Between the Sexes*. - Cambridge  
8 University Press.
- 9 Skrondal, A. and Rabe-hesketh, S. 2014. Handling initial conditions and endogenous  
10 covariates in dynamic / transition models for binary data with unobserved heterogeneity.  
11 - *J. R. Stat. Soc.* 63: 211–237.
- 12 Souchay, G. et al. 2014. To breed or not: a novel approach to estimate breeding propensity  
13 and potential trade-offs in an Arctic-nesting species. - *Ecology* 95: 2745-2756.
- 14 Spiegelhalter, D. J. et al. 2014. The deviance information criterion: 12 years on. - *J. R. Stat.*  
15 *Soc. Ser. B Stat. Methodol.* 76: 485–493.
- 16 Stearns, S. C. 1976. *Life-History Tactics: A Review of the Ideas*. - *Q. Rev. Biol.* 51: 3–47.
- 17 Stearns, S. C. 1992. *The evolution of life histories*. - Oxford University Press.
- 18 Steiner, U. K. and Tuljapurkar, S. 2012. Neutral theory for life histories and individual  
19 variability in fitness components. - *Proc. Natl. Acad. Sci. U. S. A.* 109: 4684–4689.
- 20 Steiner, U. K. et al. 2010. Dynamic heterogeneity and life history variability in the kittiwake.  
21 - *J. Anim. Ecol.* 79: 436–444.

- 1 Stoelting, R. E. et al. 2015. Life-history tradeoffs and reproductive cycles in Spotted Owls. –  
2 Auk 132: 46-64.
- 3 Stover, J. P. et al. 2012. Demographic heterogeneity impacts density-dependent population  
4 dynamics. - *Theor. Ecol.* 5: 297–309.
- 5 Tenan, S. et al. 2014. Bayesian model selection: The steepest mountain to climb. - *Ecol.*  
6 *Modell.* 283: 62–69.
- 7 Tuljapurkar, S. et al. 2009. Dynamic heterogeneity in life histories. - *Ecol. Lett.* 12: 93–106.
- 8 van de Pol, M. and Verhulst, S. 2006. Age-dependent traits: a new statistical model to  
9 separate within- and between-individual effects. - *Am. Nat.* 167: 766–73.
- 10 van de Pol, M. and Wright, J. 2009. A simple method for distinguishing within-versus  
11 between-subject effects using mixed models. - *Anim. Behav.* 77: 753–758.
- 12 van Noordwijk, a. J. and de Jong, G. 1986. Acquisition and Allocation of Resources: Their  
13 Influence on Variation in Life History Tactics. - *Am. Nat.* 128: 137–142.
- 14 Vaupel, J. W. 2002. Life expectancy at current rates vs. current conditions: A reflection  
15 stimulated by Bongaarts and Feeney’s “How Long Do We Live?” - *Demogr. Res.* 7:  
16 365–377.
- 17 Vaupel, J. W. and Yashin, A. I. 1985. Heterogeneity’s ruses: some surprising effects of  
18 selection on population dynamics. - *Am. Stat.* 39: 176–185.
- 19 Vaupel, J. W. and Missov, T. I. 2014. Unobserved population heterogeneity: A review of  
20 formal relationships. - *Demogr. Res.* 31: 659–686.
- 21 Vaupel, J. W. et al. 1979. The impact of heterogeneity in individual frailty on the dynamics of

- 1 mortality. - *Demography* 16: 439–454.
- 2 Weladji, R. B. et al. 2008. Heterogeneity in individual quality overrides costs of reproduction  
3 in female reindeer. – *Oecologia* 156: 237-247.
- 4 White, G. C. and Burnham, K. P. 1999. Program MARK: survival estimation from  
5 populations of marked animals. - *Bird Study* 46: 120–139.
- 6 White, G. C. and Cooch, E. G. 2017. Population abundance estimation with heterogeneous  
7 encounter probabilities using numerical integration. - *J. Wildl. Manage.*: In press. DOI:  
8 10.1002/jwmg.21199
- 9 Wienke, A. 2003. Frailty models. - MPIDR Working Paper WP 2003-032. Max Planck  
10 Institute for Demographic Research. Available at:  
11 <https://www.demogr.mpg.de/papers/working/wp-2003-032.pdf>
- 12 Wienke, A. 2010. Frailty models in survival analysis. - CRC Press.
- 13 Wilson, A. J. and Nussey, D. H. 2010. What is individual quality? An evolutionary  
14 perspective. - *Trends Ecol. Evol.* 25: 207–214.
- 15 Wintrebert, C. M. A. et al. 2005. Joint modelling of breeding and survival in the kittiwake  
16 using frailty models. - *Ecol. Modell.* 181: 203–213.
- 17 Wooldridge, J. M. 2005. Simple solutions to the initial conditions problem in dynamic,  
18 nonlinear panel data models with unobserved heterogeneity. - *J. Appl. Econom.* 20: 39–  
19 54.
- 20 Worthington, H. et al. 2015. Analysing Mark-Recapture-Recovery Data in the Presence of  
21 Missing Covariate Data Via Multiple Imputation. - *J. Agric. Biol. Environ. Stat.* 20: 28–  
22 46.

- 1 Yashin, A. I. et al. 2001. Hidden Frailty: Myths and Reality. <http://bit.ly/2nclmx7>
- 2 Yashin, A. I. et al. 2008. Model of hidden heterogeneity in longitudinal data. - *Theor. Popul.*
- 3 *Biol.* 73: 1–10.
- 4 Yoccoz, N. G. et al. 2002. Costs of reproduction in common eiders (*Somateria mollissima*):
- 5 an assessment of relationships between reproductive effort and future survival and
- 6 reproduction based on observational and experimental studies. - *J. Appl. Stat.* 29: 57–64.
- 7 Zens, M. S. and Peart, D. R. 2003. Dealing with death data: Individual hazards, mortality and
- 8 bias. - *Trends Ecol. Evol.* 18: 366–373.
- 9 Zheng, C. Z. et al. 2007. Age-dependent survival analyzed with Bayesian models of mark-
- 10 recapture data. – *Ecology* 88: 1970–1976.
- 11 Zucchini, W. et al. 2016. *Hidden Markov Models for Time Series: An Introduction Using R,*
- 12 *2nd Edition.* Chapman & Hall/CRC press, Boca Raton, FL.
- 13
- 14

1 **Table 1: Case studies<sup>1</sup> reporting an analysis of individual heterogeneity in demographic**  
 2 **parameters (i.e. survival and reproductive traits) within a CR context.** The table lists the  
 3 reference, the studied species, the main outcome as explicitly stated in the paper, and how  
 4 individual heterogeneity was assessed. Individual heterogeneity corresponded either to the  
 5 total amount of heterogeneity ("a priori" cases) or to heterogeneity measured using some  
 6 metrics ("a posteriori" cases). In these latter cases, the metrics used are provided.

7

| <b>Authors</b>      | <b>Studied species</b>                      | <b>Main finding</b>                                                                                                                                                                                                                                                                                                                                                                               | <b>Metric of individual heterogeneity</b>                                                                                        |
|---------------------|---------------------------------------------|---------------------------------------------------------------------------------------------------------------------------------------------------------------------------------------------------------------------------------------------------------------------------------------------------------------------------------------------------------------------------------------------------|----------------------------------------------------------------------------------------------------------------------------------|
| Guéry et al. 2017   | Common eider<br><i>Somateria mollissima</i> | "Survival of the two migrating arctic populations was impacted directly by changes in the NAO, whereas the subarctic resident population was affected by the NAO with time lags of 2– 3 years. Moreover, we found evidence for intra-population heterogeneity in the survival response to the winter NAO in the Canadian eider population, where individuals migrate to distinct wintering areas" | A priori:<br><br>Two classes of heterogeneity (finite mixture models)                                                            |
| Péron et al. 2016   | Birds (5 species) and Mammals (4 species)   | "Individual heterogeneity in survival was higher in species with short-generation time (< 3 years) than in species with long generation time (> 4 years)"                                                                                                                                                                                                                                         | A priori:<br><br>Two classes of heterogeneity (finite mixture models)<br><br>and<br><br>Continuous distribution of heterogeneity |
| Kenamer et al. 2016 | Wood Duck<br><i>Aix sponsa</i>              | "Strong positive relationship between survival and the number of successful nests"                                                                                                                                                                                                                                                                                                                | A posteriori:<br><br>Early incubation body mass                                                                                  |

|                      |                                                        |                                                                                                                                                                                                                         |                                                                   |
|----------------------|--------------------------------------------------------|-------------------------------------------------------------------------------------------------------------------------------------------------------------------------------------------------------------------------|-------------------------------------------------------------------|
|                      |                                                        | "Body mass was not a good proxy of quality"                                                                                                                                                                             |                                                                   |
| Fay et al. 2016a     | Wandering albatross<br><i>Diomedea exulans</i>         | "Age at first reproduction is negatively related to both reproductive performance and adult survival"                                                                                                                   | A priori:<br>Two classes of heterogeneity (finite mixture models) |
| Garnier et al. 2016  | Alpine ibex<br><i>Capra ibex</i>                       | "Adverse environmental conditions, such as disease outbreaks, may lead to survival costs of reproduction in long-lived species"                                                                                         | A priori:<br>Two classes of heterogeneity (finite mixture models) |
| Hileman et al. 2015  | Milksnake<br><i>Lampropeltis trinagulum</i>            | "estimate adult survival (0.72±0.16) and abundance (N = 85±35.2)"                                                                                                                                                       | A posteriori:<br>Observed maximum detection frequency             |
| Link and Hesel 2015  | Red-backed Salamander<br><i>Plethodon cinereus</i>     | "Female <i>P. cinereus</i> mature earlier and grow more quickly than males"                                                                                                                                             | A priori: Continuous distribution of heterogeneity                |
| Hartson et al. 2015  | Steelhead Trout<br><i>Oncorhynchus mykiss</i>          | "Negative relationship between density and specific growth rate over a wide range of densities, but reductions in survival only at the highest densities"                                                               | A posteriori:<br>Body length                                      |
| Hua et al. 2015      | Cumberlandian Combshell<br><i>Epioblasma brevidens</i> | "The overall mean detection probability and survival rate of released individuals reached 97.8 to 98.4% and 99.7 to 99.9% (per month)"                                                                                  | A priori:<br>Continuous distribution of heterogeneity             |
| Chambert et al. 2015 | Weddell Seal<br><i>Leptonychotes weddellii</i>         | "The probability of being absent from colonies was higher (1) in years when the extent of local sea ice was larger, (2) for the youngest and oldest individuals, and (3) for females with less reproductive experience" | A priori:<br>Continuous distribution of heterogeneity             |

|                       |                                                                                                  |                                                                                                                                                                                                                                                                            |                                                       |
|-----------------------|--------------------------------------------------------------------------------------------------|----------------------------------------------------------------------------------------------------------------------------------------------------------------------------------------------------------------------------------------------------------------------------|-------------------------------------------------------|
| Pirotta et al. 2015   | Bottlenose Dolphin<br><i>Tursiops truncatus</i>                                                  | "There were marked inter-individual differences in the predicted amount of time dolphins spent in the presence of boats, and individuals tended to be consistently over- or underexposed across summers"                                                                   | A priori:<br>Continuous distribution of heterogeneity |
| Stoelting et al. 2015 | California Spotted Owl<br><i>Strix occidentalis occidentalis</i>                                 | "Breeding reduced the likelihood of reproducing in the subsequent year by 16% to 38%, but had no influence on subsequent survival"                                                                                                                                         | A priori:<br>Continuous distribution of heterogeneity |
| Souchay et al. 2014   | Greater Snow Goose<br><i>Chen caerulescens atlantica</i>                                         | "Cost of reproduction on breeding propensity in the next year, but once females decide to breed, nesting success is likely driven by individual quality"                                                                                                                   | A posteriori:<br>Previous breeding status             |
| Koons et al. 2014     | Wild Boar<br><i>Sus scrofa</i> and<br>Lesser Snow Goose<br><i>Chen caerulescens caerulescens</i> | "Senescence can be severe for natural causes of mortality in the wild, while being largely non-existent for anthropogenic causes"                                                                                                                                          | A posteriori:<br>Cause-specific mortality             |
| Horswill et al. 2014  | Macaroni Penguin<br><i>Eudyptes chrysolophus</i>                                                 | "Survival of macaroni penguins is driven by a combination of individual quality, top-down predation pressure and bottom-up environmental forces"                                                                                                                           | A posteriori:<br>Body mass                            |
| Lindberg et al. 2013  | Pacific Black Brant<br><i>Branta bernicla nigricans</i>                                          | "Annual survival of individuals marked as goslings was heterogeneous among individuals and year specific [...]. Adult survival (0.85±0.004) was homogeneous and higher than survival of both groups of juveniles. The annual recruitment probability was heterogeneous for | A priori:<br>Two classes of heterogeneity             |



|                      |                                                         | brant >1-year-old"                                                                                                                                                                                                                                 |                                                                                             |
|----------------------|---------------------------------------------------------|----------------------------------------------------------------------------------------------------------------------------------------------------------------------------------------------------------------------------------------------------|---------------------------------------------------------------------------------------------|
| Chambert et al. 2013 | Weddell Seal<br><i>Leptonychotes weddellii</i>          | "Existence of a latent individual heterogeneity in the population, with robust individuals expected to produce twice as many pups as 'frail' individuals"                                                                                          | A priori:<br>Continuous distribution of heterogeneity                                       |
| Barbraud et al. 2013 | Wandering Albatross<br><i>Diomedea exulans</i>          | "Strong evidence for heterogeneity in survival with one group of individuals having a 5.2% lower annual survival probability than another group"                                                                                                   | A priori:<br>Two classes of heterogeneity                                                   |
| Blomberg et al. 2013 | Greater Sage Grouse<br><i>Centrocercus urophasianus</i> | "Evidence for heterogeneity among females with respect to reproductive success; compared with unsuccessful females, females that raised a brood successfully in year t were more than twice as likely to be successful in year t+1"                | A posteriori:<br>Previous breeding status                                                   |
| Morano et al. 2013   | North American Elk<br><i>Cervus elaphus</i>             | "No difference in survival probabilities between pregnant and nonpregnant individuals or as a function of recruiting an offspring [...and] negative effect of recruiting an offspring in the current year on becoming pregnant the following year" | A posteriori:<br>Lactation status and body condition                                        |
| Pradel et al. 2012   | Greater Flamingo<br><i>Phoenicopterus roseus</i>        | "Breeding probability varied within three levels of experience. [...] and] With random effects, the advantage of experience was unequivocal only after age 9 while in young having > 1 experience was penalizing"                                  | A priori:<br>Continuous distribution of heterogeneity<br>and<br>A posteriori:<br>Experience |
| Reichert et al. 2012 | Florida Snail Kite<br><i>Rostrhamus</i>                 | "experience is an important factor determining whether or not individuals attempt to breed"                                                                                                                                                        | A posteriori:<br>Experience                                                                 |

|                              |                                                           |                                                                                                                                                                                                                                                                             |                                                                    |
|------------------------------|-----------------------------------------------------------|-----------------------------------------------------------------------------------------------------------------------------------------------------------------------------------------------------------------------------------------------------------------------------|--------------------------------------------------------------------|
|                              | <i>sociabilis plumbeus</i>                                | during harsh environmental conditions"                                                                                                                                                                                                                                      |                                                                    |
| Robert et al. 2012           | Monteiro's Storm Petrel<br><i>Oceanodroma monteiroi</i>   | "reproductive costs act on individuals of intermediate quality and are mediated by environmental harshness"                                                                                                                                                                 | A posteriori: successful vs. unsuccessful breeders                 |
| Hernandez-Matias et al. 2011 | Bonelli's eagle<br><i>Aquila fasciata</i>                 | "4-year-old and older successful breeders were more likely to breed the following year than failed adult breeders (0.869 vs. 0.582), suggesting that the cost of reproduction is small in comparison with the variation in quality among individuals or their territories " | A posteriori: successful vs. unsuccessful breeders                 |
| Briggs et al. 2011           | Swainson's hawks<br><i>Buteo swainsoni</i>                | "Adult survival was inversely correlated with average reproductive output, with individuals producing >2 offspring having decreased survival [... and] reproduction in any year was positively correlated with survival"                                                    | A posteriori: Average annual nest productivity                     |
| Lee 2011                     | Northern elephant seals<br><i>Mirounga angustirostris</i> | "Primiparous breeders did not suffer more than experienced breeders during years of environmental stress. [... and] Lower variances in survival of multiparous breeders suggest that primiparous adults constitute a more heterogeneous portion of the population"          | A posteriori: inexperienced vs. experienced breeders               |
| Moyes et al. 2011            | Red deer<br><i>Cervus elaphus</i>                         | "The probability of reproducing unsuccessfully after a successful year is relatively low and varies very little, but is highest in young individuals with low PARE.                                                                                                         | A posteriori: Proportional age-specific reproductive effort (PARE) |

|                        |                                                      | [...and] Reproduction costs increase with declining PARE"                                                                                                                                                                                  |                                                                |
|------------------------|------------------------------------------------------|--------------------------------------------------------------------------------------------------------------------------------------------------------------------------------------------------------------------------------------------|----------------------------------------------------------------|
| Marzolin et al. 2011   | Dipper<br><i>Cinclus cinclus</i>                     | "Strong evidence for actuarial senescence with an onset of senescence estimated at about 2.3 years"                                                                                                                                        | A priori:<br>Continuous distribution of heterogeneity          |
| Buoro et al. 2010      | Atlantic salmon<br><i>Salmo salar</i>                | "Cost of reproduction on survival for fish staying in freshwater and a survival advantage associated with the "decision" to migrate"                                                                                                       | A priori:<br>Continuous distribution of heterogeneity          |
| Kovach et al. 2010     | Intertidal snail<br><i>Nucella lima</i>              | "Survival estimates from the best-fit model were different between habitat types"                                                                                                                                                          | A posteriori:<br>Microhabitat use, individual color and length |
| Reid et al. 2010       | Red-billed choughs<br><i>Pyrrhocorax pyrrhocorax</i> | "The negative correlation between offspring survival and maternal lifespan was strongest when environmental conditions meant that offspring survival was low across the population"                                                        | A posteriori:<br>Longevity                                     |
| Maniscalco et al. 2010 | Steller sea lion<br><i>Eumetopias jubatus</i>        | "Females which gave birth had a higher probability of surviving and giving birth in the following year compared to females that did not give birth"                                                                                        | A posteriori:<br>Give birth vs. do not give birth              |
| Millon et al. 2010     | Tawny owl<br><i>Strix aluco</i>                      | "Females who postponed reproduction to breed for the first time at age 3 during an Increase phase, produced more recruits, even when accounting for birds that may have died before reproduction. No such effects were detected for males" | A posteriori:<br>Age at first breeding                         |
| Lescroël et al. 2009   | Adélie penguin<br><i>Pygoscelis adeliae</i>          | "Adult survival ranged from 64-79%, with BQI accounting for 91% of variability in the entire study population, but only 17% in                                                                                                             | A posteriori:<br>Breeding quality                              |

|                       |                                                          | experienced breeders"                                                                                                                                                                                                                                                   | (BQI)                                                   |
|-----------------------|----------------------------------------------------------|-------------------------------------------------------------------------------------------------------------------------------------------------------------------------------------------------------------------------------------------------------------------------|---------------------------------------------------------|
| Bonenfant et al. 2009 | Bighorn sheep<br><i>Ovis canadensis</i>                  | "In all age classes, natural survival was either weakly related to (lambs, adult rams) or positively associated (yearling rams) with early horn growth"                                                                                                                 | A posteriori:<br>Early horn growth                      |
| Sedinger et al. 2008  | Black brent geese<br><i>Branta bernicla nigricans</i>    | "Individuals with a higher probability of breeding in one year also had a higher probability of breeding the next year"                                                                                                                                                 | A posteriori:<br>Bred in the previous years vs. did not |
| Pistorius et al. 2008 | Southern elephant seal<br><i>Mirounga leonina</i>        | "Mean postbreeding (pelagic phase between breeding and molting, about 62 days) survival of primiparous females was 0.830 compared to 0.912 for more-experienced females"                                                                                                | A posteriori:<br>Reproductive experience                |
| Weladji et al. 2008   | Reindeer<br><i>Rangifer tarandus</i>                     | "Successful breeders had higher survival and subsequent reproductive success than experienced non-breeders and unsuccessful breeders, independently of the age at primiparity. [...] Successful females at early primiparity remained successful throughout their life" | A posteriori:<br>Age at primiparity                     |
| Le Bohec et al. 2007  | King penguin<br><i>Aptenodytes patagonicus</i>           | "Failed breeders in year t have a lower probability to reproduce successfully in year t + 1 than non-breeders in year t [...] and] successful breeders showed higher survival probability"                                                                              | A posteriori:<br>successful vs. unsuccessful breeders   |
| Zheng et al. 2007     | Glanville fritillary butterfly<br><i>Melitaea cinxia</i> | "We found that mortality rate increased with age, that mortality rate was much higher during the day than during the night, and that the life span of females originating from newly established populations was shorter than the life span of                          | A priori:<br>Continuous distribution of heterogeneity   |

|                      |                                                                                                                              | females from old populations"                                                                                                                                                                                                                                                                                                                                                                                                                                                                                                                                                                      |                                                                       |
|----------------------|------------------------------------------------------------------------------------------------------------------------------|----------------------------------------------------------------------------------------------------------------------------------------------------------------------------------------------------------------------------------------------------------------------------------------------------------------------------------------------------------------------------------------------------------------------------------------------------------------------------------------------------------------------------------------------------------------------------------------------------|-----------------------------------------------------------------------|
| Hadley et al. 2007   | Weddell seal<br><i>Leptonychotes weddellii</i>                                                                               | "Presence of reproductive costs to survival (mean annual survival probability was 0.91 for breeders vs. 0.94 for nonbreeders) [... and] Reproductive costs to subsequent reproductive probabilities were also present for first-time breeders (mean probability of breeding the next year was 31.3% lower for first-time breeders than for experienced breeders)"                                                                                                                                                                                                                                  | A posteriori:<br>Breeding experience                                  |
| Beauplet et al. 2006 | Subantarctic fur seal<br><i>Arctocephalus tropicalis</i>                                                                     | "Survival was lower for non-breeders than for breeders, among both prime-aged (0.938 vs 0.982) and older (0.676 vs 0.855) females [... and] non-breeders exhibited higher probabilities of being non-breeders the following year than did breeders (0.555 vs 0.414)"                                                                                                                                                                                                                                                                                                                               | A posteriori:<br>Breeders vs. non-breeders                            |
| Blums et al. 2005    | Tufted duck<br><i>Aythya fuligula</i><br>Common pochard<br><i>Aythya ferina</i><br>Northern shoveler<br><i>Anas clypeata</i> | "For all three species, females that tended to nest earlier than the norm exhibited the highest survival rates, but very early nesters experienced reduced survival and late nesters showed even lower survival. For shovelers, females in average body condition showed the highest survival, with lower survival rates exhibited by both heavy and light birds. For common pochard and tufted duck, the highest survival rates were associated with birds of slightly above-average condition, with somewhat lower survival for very heavy birds and much lower survival for birds in relatively | A posteriori:<br>Relative body condition and relative time of nesting |

|                        |                                                      |                                                                                                                                                                                                                                                                                                                                                                                                              |                                                        |
|------------------------|------------------------------------------------------|--------------------------------------------------------------------------------------------------------------------------------------------------------------------------------------------------------------------------------------------------------------------------------------------------------------------------------------------------------------------------------------------------------------|--------------------------------------------------------|
|                        |                                                      | poor condition"                                                                                                                                                                                                                                                                                                                                                                                              |                                                        |
| Barbraud et al. 2005   | Blue petrel<br><i>Halobaena caerulea</i>             | "Survival of first-time breeders was lower than that of inexperienced nonbreeders [...]. Survival of inexperienced individuals (both breeders and nonbreeders), but not of experienced ones, was negatively affected by poor environmental oceanographic conditions [... and] Survival and the probability of breeding in the next year for experienced birds were higher for breeders than for nonbreeders" | A posteriori:<br>Breeding experience                   |
| Wintrebert et al. 2005 | Kittiwake<br><i>Rissa tridactyla</i>                 | "Survival is positively correlated with breeding indicating that birds with greater inclination to breed also had higher survival"                                                                                                                                                                                                                                                                           | A priori:<br>Continuous distribution of heterogeneity  |
| Roulin et al. 2003     | Tawny owls<br><i>Strix aluco</i>                     | "The proportion of all breeding females that were reddish-brown was greater in years when the breeding density was lower [... and] greyish females bred less often than reddish-brown females, although their survival probability was similar"                                                                                                                                                              | A posteriori:<br>Colour polymorphism                   |
| Reid et al. 2003       | Red-billed choughs<br><i>Pyrrhocorax pyrrhocorax</i> | "Females that ultimately reached the greatest ages had laid small clutches and fledged few offspring during their first few breeding attempts. Females that were more productive when they were young had relatively shorter lives"                                                                                                                                                                          | A priori:<br>Lifespan                                  |
| Cam et al. 2003        | Kittiwake<br><i>Rissa tridactyla</i>                 | "Individuals with shorter rearing periods had lower local survival during the first winter [... and] The length of the rearing period had long-term consequences on reproductive performance [...                                                                                                                                                                                                            | A posteriori:<br>Rank and length of the rearing period |

|                      |                                      |                                                                                                                                                                                                                                                                                                                                                                                                                                                                                                              |                                                          |
|----------------------|--------------------------------------|--------------------------------------------------------------------------------------------------------------------------------------------------------------------------------------------------------------------------------------------------------------------------------------------------------------------------------------------------------------------------------------------------------------------------------------------------------------------------------------------------------------|----------------------------------------------------------|
|                      |                                      | and] negative influence of rank on survival before recruitment and recruitment probability"                                                                                                                                                                                                                                                                                                                                                                                                                  |                                                          |
| Cam et al. 2002a     | Kittiwake<br><i>Rissa tridactyla</i> | "Birds that were more likely to survive were also more likely to breed, given that they survived"                                                                                                                                                                                                                                                                                                                                                                                                            | A priori:<br>Continuous distribution of heterogeneity    |
| Cam et al. 2002b     | Kittiwake<br><i>Rissa tridactyla</i> | "Squatters have a higher survival and recruitment probability, and a higher probability of breeding successfully in the first breeding attempt in all age-classes where this category is represented"                                                                                                                                                                                                                                                                                                        | A posteriori:<br>Squatters vs. non-squatters             |
| Cam and Monnat 2000a | Kittiwake<br><i>Rissa tridactyla</i> | "The influence of age on survival and future breeding probability is not the same in nonbreeders and breeders"                                                                                                                                                                                                                                                                                                                                                                                               | A posteriori:<br>Yearly reproductive state               |
| Cam and Monnat 2000b | Kittiwake<br><i>Rissa tridactyla</i> | "First-time breeders have a lower probability of success, a lower survival and a lower probability of breeding in the next year than experienced breeders [... and] neither experienced nor inexperienced breeders have a lower survival or a lower probability of breeding in the following year than birds that skipped a breeding opportunity. [... and] When age and breeding success are controlled for, there is no evidence of an influence of experience on survival or future breeding probability" | A posteriori:<br>Breeding experience and breeding status |

1 <sup>1</sup> The literature survey was performed in ISI Web of Knowledge by looking for references corresponding to the  
2 following "Topic" keywords: (((("individual variability" OR "individual heterogeneity" OR "individual quality")  
3 AND ("capture-recapture" OR "mark-recapture" OR "capture-mark-recapture")))). A total of 162 references were  
4 recovered. We read all summaries and only selected case studies looking for individual heterogeneity in  
5 demographic parameters estimated from CR models.

1 **Table 2. Detection of a trade-off between reproduction and survival using multistate**  
2 **capture-recapture models after individual heterogeneity is accounted for.** We simulated  
3 multistate capture-recapture data with two states, non-breeding (NB) and breeding (B). To  
4 mimic individual heterogeneity, we considered robust individuals with survival  $\phi_{NB} = 0.7$   
5 and  $\phi_B = 0.8$  and frail individuals with survival  $\phi_{NB} = 0.7$  and  $\phi_B = 0.6$ , the only difference  
6 being in the survival of frail breeders that is much lower than that of robust breeders. For each  
7 group, we simulated the fate of 100 newly marked individuals in each year of a 6-year  
8 experiment. We report parameter estimates from two multistate models in which i) we  
9 ignored individual heterogeneity (column '*Ignoring* individual heterogeneity) and ii) we  
10 explicitly incorporated an individual covariate to handle this source of heterogeneity (column  
11 '*Incorporating* individual heterogeneity'). The parameters we used to simulate the data are  
12 given in the column 'Truth'. We refer to the Appendix for more details. **The cost of breeding**  
13 **on survival is detected only in frail individuals after accounting for individual**  
14 **heterogeneity through quality ( $\Delta AICc = 120$ ).**

| Parameter                       | <i>Ignoring</i><br>Individual heterogeneity | <i>Incorporating</i><br>individual heterogeneity | Truth |
|---------------------------------|---------------------------------------------|--------------------------------------------------|-------|
| Survival of frail non-breeders  | 0.69 [0.67; 0.72]                           | 0.70 [0.66; 0.73]                                | 0.7   |
| Survival of frail breeders      | 0.70 [0.68; 0.72]                           | 0.58 [0.55; 0.61]                                | 0.6   |
| Survival of robust non-breeders | 0.69 [0.67; 0.72]                           | 0.69 [0.65; 0.72]                                | 0.7   |



---

|                                          |                   |                   |     |
|------------------------------------------|-------------------|-------------------|-----|
| Survival of robust breeders              | 0.70 [0.68; 0.72] | 0.80 [0.77; 0.82] | 0.8 |
| Transition from non-breeding to breeding | 0.78 [0.75; 0.80] | 0.78 [0.75; 0.80] | 0.8 |
| Transition from breeding to non-breeding | 0.31 [0.29; 0.33] | 0.31 [0.28; 0.33] | 0.3 |

---

|           |                   |                   |     |
|-----------|-------------------|-------------------|-----|
| Detection | 0.90 [0.88; 0.91] | 0.90 [0.88; 0.91] | 0.9 |
|-----------|-------------------|-------------------|-----|

---

1

2

1

2 **Figure 1. Senescence is masked when individual heterogeneity is not accounted for:**

3 **random-effect capture-recapture model.** We simulated the fate of 500 individuals (in grey)  
4 from a single cohort with survival decreasing as they age over a 20-year study. We also added  
5 a frailty for each individual  $\text{logit}(\phi_i(a)) = \beta_0 + \beta_1 a + \varepsilon_i$  where  $\varepsilon_i \sim N(0, \sigma^2)$ . We used  
6  $\beta_0 = 1, \beta_1 = -0.05$  and  $\sigma = 1$ . We considered the same detection probability  $p = 0.5$  for all  
7 individuals. We report the age-specific survival patterns from two models in which i) we  
8 ignored individual heterogeneity (in blue) and ii) we incorporated an individual random effect  
9 to handle with this source of heterogeneity (in green), both to be compared to the actual trend  
10 that we used to simulate the data (in red). Clearly, ignoring individual heterogeneity obscures  
11 senescence in survival. We refer to the Appendix for more details.

12

13 **Figure 2. Senescence is masked when individual heterogeneity is not accounted for:**

14 **finite-mixture capture-recapture model.** We simulated the fate of 1000 individuals from a  
15 single cohort that were split into a group of robust individuals in proportion  $\pi$  with constant  
16 high survival  $\phi_R$  and a group of frail individuals with survival  $\phi_F$  that aged over the 20 years  
17 of the study according to the relationship  $\text{logit}(\phi_F(a)) = \beta_0 + \beta_1 a$ . We used  $\pi = 0.3,$   
18  $\phi_R = 0.85, \beta_0 = 0$  and  $\beta_1 = -0.07$ . We considered the same detection probability  $p = 0.5$   
19 for all individuals. We report the age-specific survival patterns from two models in which i)  
20 we ignored individual heterogeneity (in blue) and ii) we used mixture models with two hidden  
21 classes of individuals to handle with heterogeneity (in green), both to be compared to the  
22 actual trend that we used to simulate the data (in grey). Clearly, ignoring individual  
23 heterogeneity obscures senescence in survival. We refer to the Appendix for more details.

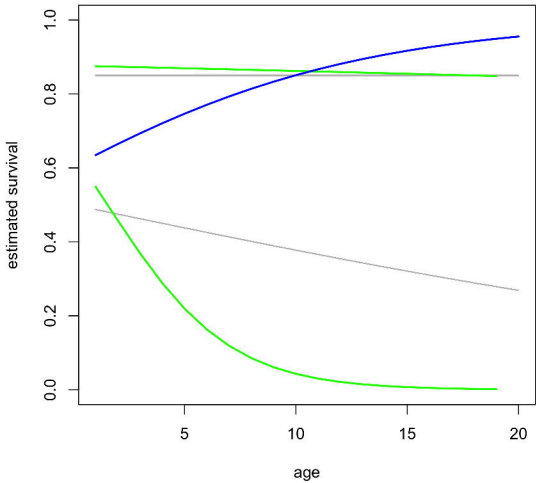

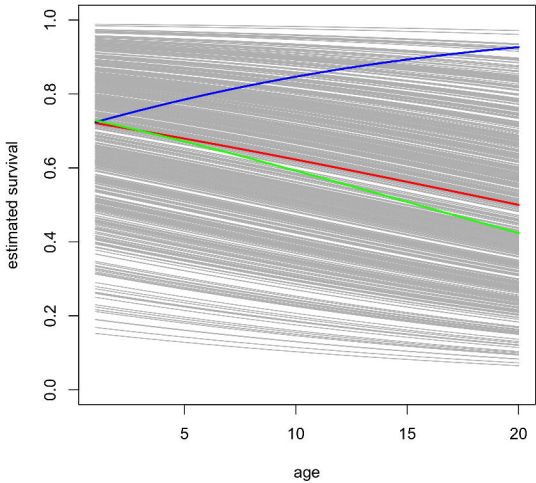

Source: https://www.biorxiv.org/content/biorxiv/early/2017/08/03/120683.full.pdf
